# Supplementary material for: Examining protective and buffering associations between sociocultural factors and adverse childhood experiences among American Indian adults with type 2 diabetes: a quantitative, community-based participatory research approach
Source: PubMed Central journal article supplement — BMJ Open. 2018 Sep 19;8(9):e022265. doi: 10.1136/bmjopen-2018-022265 (PMC6150153; doi:10.1136/bmjopen-2018-022265), 2018-09-19
Supplement: bmjopen-2018-022265.draft_revisions.pdf [file bmjopen-2018-022265.draft_revisions.pdf]

# BMJ Open

BMJ Open is committed to open peer review. As part of this commitment we make the peer review history of every article we publish publicly available.

When an article is published we post the peer reviewers' comments and the authors' responses online. We also post the versions of the paper that were used during peer review. These are the versions that the peer review comments apply to.

The versions of the paper that follow are the versions that were submitted during the peer review process. They are not the versions of record or the final published versions. They should not be cited or distributed as the published version of this manuscript.

BMJ Open is an open access journal and the full, final, typeset and author-corrected version of record of the manuscript is available on our site with no access controls, subscription charges or pay-per-view fees (<http://bmjopen.bmj.com>).

If you have any questions on BMJ Open's open peer review process please email [info.bmjopen@bmj.com](mailto:info.bmjopen@bmj.com)

# BMJ Open

## Examining Protective and Buffering Effects of Social and Cultural Factors on Adverse Childhood Experiences among American Indian Adults with Type 2 Diabetes: A Quantitative, Community-Based Participatory Research Approach

|                               |                                                                                                                                                                                         |
|-------------------------------|-----------------------------------------------------------------------------------------------------------------------------------------------------------------------------------------|
| Journal:                      | <i>BMJ Open</i>                                                                                                                                                                         |
| Manuscript ID                 | bmjopen-2018-022265                                                                                                                                                                     |
| Article Type:                 | Research                                                                                                                                                                                |
| Date Submitted by the Author: | 13-Feb-2018                                                                                                                                                                             |
| Complete List of Authors:     | Brockie, Teresa; Johns Hopkins University, Community Public Health Nursing<br>Elm, Jessica; University of Washington, School of Social Work<br>Walls, Melissa; University of Minnesota, |
| Keywords:                     | Adverse Childhood Experiences, ACEs, American Indians, Type 2 Diabetes, Culture                                                                                                         |
|                               |                                                                                                                                                                                         |

SCHOLARONE™  
Manuscripts

Peer Review Only

1  
2  
3 **Examining Protective and Buffering Effects of Social and Cultural Factors on Adverse**  
4 **Childhood Experiences among American Indian Adults with Type 2 Diabetes: A Quantitative,**  
5 **Community-Based Participatory Research Approach**  
6

7  
8 Teresa N. Brockie, PhD, RN  
9 Research Associate  
10 Community Public Health Nursing  
11 Johns Hopkins School of Nursing  
12 525 N. Wolfe Street Room 440  
13 Baltimore, MD 21205  
14 [tbrocki1@jhu.edu](mailto:tbrocki1@jhu.edu)  
15

16  
17 Jessica H. L. Elm, MSW, PhD  
18 University of Washington  
19 School of Social Work  
20 Seattle, WA  
21 [jelm@uw.edu](mailto:jelm@uw.edu)  
22

23  
24 **Corresponding Author:** Melissa L. Walls, PhD  
25 Associate Professor  
26 Department of Biobehavioral Health & Population Sciences  
27 University of Minnesota Medical School, Duluth campus  
28 1035 University Drive  
29 235 Smed  
30 Duluth, MN 55812  
31 218-726-8367  
32 [mlwalls@d.umn.edu](mailto:mlwalls@d.umn.edu)  
33  
34

35 **Word count:** 2410  
36

37  
38 **Conflict of interest and funding statement:**

39 The Maawaji' idi-oog Mino-ayaawin (Gathering for Health) project is a community-based  
40 participatory research (CBPR) collaboration between the University of Minnesota Medical  
41 School, Duluth campus and five Ojibwe communities. This study was funded by the National  
42 Institute of Diabetes and Digestive and Kidney Diseases of the National Institutes of Health  
43 under Award Number DK091250 (M. Walls, PI). The contents of this manuscript are  
44 attributable to the authors and do not necessarily represent the viewpoints of the NIH.  
45

46 **Financial disclosure:**

47 No financial disclosures were reported by any of the authors of this paper.

48 **Author Statement of Contributions:**

49 T.B. was responsible for drafting the literature review, discussion and conclusions sections. J.E. edited  
50 and added substantive content to the manuscript. M.W. performed data analyses and drafted methods  
51 and results sections and oversaw data collection. All authors reviewed the final version of the  
52 manuscript.  
53

54  
55 **Key Words:** Adverse Childhood Experiences, ACEs, American Indians, Type 2 Diabetes, Culture  
56  
57  
58  
59

## Abstract

### Objectives:

The purpose of this study was to determine the frequency of select Adverse Childhood Experiences (ACEs) among a sample of American Indian adults living with type 2 diabetes and to examine associations between ACEs, social support, cultural factors, and self-rated physical and mental health.

### Design:

Survey data for this observational study was collected using computer assisted survey interviewing techniques between 2013 – 2015.

### Setting:

Participants were randomly selected from American Indians (AI) tribal clinic facilities on five reservations in the upper Midwestern United States.

### Participants:

Inclusion criteria were; a diagnosis of type 2 diabetes, age 18 years or older, and self-identified as AI. The sample includes N=192 adults (55.7% female; mean age = 46.3 years).

### Primary Measures:

We assessed nine adverse childhood experiences related to household dysfunction, violence, and emotional, physical, or sexual abuse. Independent variables included social support, diabetes specific support, and two cultural factors: traditional spiritual activities and connectedness. Primary outcomes of interest were self-rated physical and mental health.

### Results:

An average of 3.05 adverse childhood experiences were reported by participants and 81.9% (n = 149) said they had experienced at least one ACE. Controlling for gender, age, and income, ACEs were negatively associated with self-rated mental and physical health ( $p < .05$ ). Involvement in spiritual activities, social support, and diabetes-specific support were all positively and significantly associated with self-reported mental and physical health in these models. Social support variables moderated the impact of ACEs on physical health.

### Conclusions:

This research demonstrates the impact of childhood experiences on adult AI diabetes patient wellbeing. Health professionals are able to use the findings from this study to supplement not only to augment their assessment of AI patients, but also to more clearly guide clients to appropriate social support services and resources for cultural involvement.

## ARTICLE SUMMARY

### Strengths and Limitations of this Study:

- This is the first quantitative observational study of which we are aware to examine American Indian adult cultural and social protective factors in the face of earlier life adversities and their potential moderating relationship between Adverse Childhood Experiences (ACEs) and adult self-rated mental and physical health.
- Study scope and methodology was developed using community-based participatory research principles to promote authentic researcher/community member collaboration.
- We contribute to a limited body of literature on ACEs and American Indian health by assessing ACE exposure and correlates for a clinical sample of Native adults.
- Our reliance on retrospective reports of ACEs may involve systematic error including recall bias that should be considered when interpreting findings.

## INTRODUCTION

Adverse childhood experiences (ACEs) are early life stressful situations or traumatic events that often co-occur, and potent determinants of health linked to increased morbidity and mortality across the life course.<sup>1-9</sup> The foundational Centers for Disease Control and Prevention (CDC) Kaiser Permanente ACEs retrospective adult studies (Kaiser/CDC studies) identified a set of eight to ten childhood stressors including childhood emotional, physical, and sexual abuse, emotional and physical neglect, witnessing intimate partner violence, parental separation, and living with a substance abusing, mentally ill, or criminal household member.<sup>5,6</sup> These childhood stressors have been shown to correspond with later life outcomes, such as Type 2 Diabetes (T2D), substance abuse, and suicide attempts, with strong graded relationships between number of ACE exposures and risk for health outcomes.<sup>5,6,10</sup> Similar studies like the National Survey of Children's Health have replicated and adapted from the Kaiser/CDC studies for diverse national samples.<sup>11</sup> In doing so, ACEs criteria have been expanded to include peer victimization, lack of friends, poor school performance, community violence, someone close having had a bad accident or illness, persistent parental arguing, exposure to racial or ethnic discrimination, parent death, and economic hardship.<sup>11,12</sup> In the absence of protective factors, existing evidence suggests that early trauma and toxic stress can have lasting effects on physical and mental health.<sup>3,5,6,11</sup>

The emerging literature on ACEs among the American Indian/Alaska Native (AI/AN) population has identified disproportionately high rates of co-occurring childhood stressors and associations with multiple health outcomes including suicidality, substance misuse, depressive and PTSD symptoms, and diabetes.<sup>7,8,11-14</sup> These findings are particularly salient given the pronounced health inequities within AI/AN communities. For example, AI/AN children and adults have the highest

1  
2  
3 prevalence of T2D in the United States (US). Data from 2013-2015 indicated adult overall prevalence  
4 for AI/ANs was 15.1%, versus 7.4% for non-Hispanic whites.<sup>15</sup> Further, T2D represents a modern  
5 epidemic among AI/ANs, especially considering that prior to the 1940's the diagnosis was relatively  
6 uncommon for this demographic.<sup>16</sup>  
7  
8  
9  
10

11  
12 In the wake of the compelling evidence that early life stressors can lead to serious health  
13 consequences, researchers have begun identifying factors that may provide a protective effect against  
14 ACEs-related poor outcomes.<sup>17</sup> One way in which protective factors operate is through the fostering,  
15 building, and exertion of resilience as an ability to overcome significant life stressors, resulting from  
16 access to combinations of protective resources, and interacting stress processes.<sup>18-22</sup> In a U.S. sample,  
17 factors such as sense of community have shown to have direct and indirect protective effects on ACEs,  
18 including moderating roles for the impact of ACEs on adult mental health.<sup>23</sup>  
19  
20  
21  
22  
23  
24  
25  
26  
27

28 Resilience promotion is not a new concept within Tribal communities. AI/ANs have  
29 longstanding traditional knowledge that include instructions on how to stay well and thrive. Indigenous  
30 theoretical literature also supports notions of sociocultural resource access and cultural participation as  
31 having protective effects.<sup>24-26</sup> AI/AN resilience is dynamic, evident in a life course framework, and  
32 accessed through familial, communal, and cultural knowledge and expressions (e.g., traditional activity  
33 participation, spiritual practices, positive identity promotion, social support, feelings of connectedness  
34 to family and nature)<sup>24, 26</sup> These deeply rooted beliefs and practices have been identified as multilevel  
35 factors that can buffer poor outcomes, strengthen resilience, and promote health.<sup>27</sup>  
36  
37  
38  
39  
40  
41  
42  
43  
44  
45  
46

47 Preventing ACEs and increasing access to and participation in resilience-building opportunities  
48 could decrease ACEs-associated poor health and assist in closing the health equity gap for AI  
49 communities. An examination of moderating and health promoting factors is particularly salient for  
50 Tribal communities given complex health service delivery systems and limited systemic resources for  
51  
52  
53  
54  
55  
56  
57  
58  
59  
60

1  
2  
3 monitoring and addressing behavioral health on reservations.<sup>19,28</sup> Despite this great need, few studies  
4  
5 have examined AI/AN-specific protective factors or resilience contributors in the context of co-  
6  
7 occurring childhood stressors. Of the available AI/AN ACEs literature, Burnette and colleagues (2015)  
8  
9 reported social support had a protective effect on depressive symptoms among AI/AN older adults who  
10  
11 have experienced ACEs.<sup>13</sup> In another study, youth who experienced child maltreatment and other  
12  
13 stressors had a reduced likelihood of suicidality if they discussed problems with friends or family and  
14  
15 reported connectedness with family.<sup>28</sup> However, no AI/AN-specific studies of which we are aware  
16  
17 have investigated adult cultural and social protective factors in the face of earlier life adversities and  
18  
19 their potential for moderating the relationship between ACEs and adult self-rated mental and physical  
20  
21 health.  
22  
23  
24  
25

26 The purpose of this study is to 1) determine the frequency of select ACEs within a sample of  
27  
28 AI/AN adults living with T2D, and 2) examine associations between ACEs, social supports, cultural  
29  
30 factors, and self-rated physical and mental health. Three hypotheses guided our inquiry:  
31  
32

33 H1: ACEs will be negatively associated with self-reported physical and mental health status.

34  
35 H2: Social support (general and diabetes-specific) and Indigenous cultural factors will be  
36  
37 positively associated with self-reported physical and mental health status.  
38

39  
40 H3: Social support and cultural factors will buffer (modify) the effects of ACEs on physical and  
41  
42 mental health.  
43

## 44 **METHODS**

45  
46 The Maawaji' idi-oog Mino-ayaawin (Gathering for Health) project is a community-based  
47  
48 participatory research (CBPR) collaboration between [removed for blind review] and five AI (i.e.,  
49  
50 Ojibwe) communities. The primary purpose of the study was to understand sources of stress and  
51  
52 examine their impact on T2D-related outcomes for AIs. Tribal resolutions supporting the project were  
53  
54  
55  
56  
57  
58  
59  
60



1  
2  
3 granted by all five tribal nation governments. Community Research Councils (CRCs) from each tribe  
4 worked closely with the university research team to develop and implement study protocols, participate  
5 in data collection, interpretation, and dissemination. All CRCs read and/or contributed to this  
6 manuscript prior to journal submission, and the paper was approved for submission by the Indian  
7 Health Service (IHS) National Institutional Review Board. Project methodology and human subjects  
8 approval was granted by the University of [removed for blind review] (IRB) and the IHS IRB.  
9

### 17 **Sample**

19 Staff at each IHS clinic site generated simple random samples for study recruitment from  
20 patient records. Inclusion criteria were; a diagnosis of type 2 diabetes, age 18 years or older, and self-  
21 identified as AI/AN. A total of 194 participants enrolled in the study, representing a baseline response  
22 rate of 67%.  
23  
24  
25  
26  
27

### 28 **Procedure**

31 Clinic staff sent study letters of invitation and brochures to residences of randomly selected  
32 patients. Non-refusing individuals were contacted and screened for eligibility by trained community  
33 interviewers. Visits were scheduled at a location of participants' choosing, at which time interviewers  
34 gathered signed informed consent and HIPAA authorization forms prior to administering surveys. Data  
35 for this manuscript includes responses from the 192 participants for which we have baseline Computer-  
36 Assisted Personal Interviews (CAPI) completed from 2013 to 2015. Participants received a \$50  
37 incentive and a small, culturally meaningful gift.  
38  
39  
40  
41  
42  
43  
44  
45

### 46 **Measures**

49 Three control variables were included in analyses: *age* (in years), *gender* (male = 0, female =  
50 1), and *per capita household income* were each assessed via self-report survey responses. Two  
51 dependent variables, self-rated mental health and self-rated physical health, each ranged in value from  
52  
53  
54  
55  
56  
57  
58  
59

0 (poor) to 4 (excellent); thus, higher scores indicate better health. A continuous ACEs measure was created by summing affirmative responses to 9 experiences related to household dysfunction, witnessing violence, and emotional, physical, and sexual abuse while growing up; participants were included in this continuous measure if they answered at least 5 of the 9 ACE items (n = 182). Several protective independent variables were also included. Social support was assessed by 9 items adapted from previous measures of perceived emotional and instrumental support.<sup>29</sup> Diabetes-specific support (adapted from Fitzgerald)<sup>30</sup> includes 5 items and assesses perceived support directly related to diabetes management. Traditional spiritual activities include summed 'yes' responses to 10 spiritually relevant cultural activities, such as seeking advice/guidance from a spiritual advisor or participating in a sweat lodge, which were engaged in during the prior year. We also utilized an adapted Awareness of Connectedness measure that included 6 items assessing degree of connection to nature, family, and community.<sup>1</sup>

### Statistical Analysis

We used SPSS v. 24 to conduct all analyses with list-wise deletion of missing values, including Ordinary Least Squares (OLS) regression analyses for multivariate models. There were few missing cases across variables; full sample responses were given for age, gender, and communal mastery and missing data for remaining variables ranges from 1 – 4 cases total, with the exception of individual ACE items (Table 1). We generated a total of eight separate OLS models to examine the associations between the four protective factors and their potentially moderating effects for each of the two outcome variables (mental and physical health) after accounting for controls. Tests of moderation included a multiplicative interaction term for each protective variable x ACE scores.

### RESULTS

The average age of the study participants was 46.3 years (SD = 12.2), mean per capita household income was \$3,750, and slightly more than half were female (55.7%). Frequencies of nine ACEs appear in Table 1. An average of 3.05 (SD = 2.46) ACEs were reported by participants and 81.9% (n = 149) reported at least one ACE (not displayed).

**Table 1: Adverse Childhood Experiences among American Indian Adults Living with Type 2 Diabetes**

|                                                                                                                                                           | Never/No At | Least Once/Yes |
|-----------------------------------------------------------------------------------------------------------------------------------------------------------|-------------|----------------|
| When you were growing up, did you live with a household member who was a problem drinker or alcoholic, or misused street or prescription drugs? (n = 181) | 51.9%       | 48.1%          |
| When you were growing up, did you live with a household member who was depressed, mentally ill, or suicidal? (n = 180)                                    | 78.3%       | 21.7%          |
| When you were growing up, did you live with a household member who was ever sent to jail or prison? (n=179)                                               | 68.2%       | 31.8%          |
| When you were growing up, how often did you see or hear a parent or household member in your home being slapped, kicked, punched, or beaten up? (n=180)   | 52.2%       | 47.8%          |
| When you were growing up, how often did a parent, guardian, or other household member yell, scream, swear at you, insult you, or humiliate you? (n = 182) | 51.1%       | 48.9%          |
| When you were growing up, how often did a parent, guardian, or other household member spank you, slap you, kick you, punch you, or beat you up? (n = 179) | 43.6%       | 56.4%          |
| When you were growing up, how often did someone touch or fondle you in a sexual way when you did not want them to? (n = 179)                              | 76.5%       | 23.5%          |
| When you were growing up, how often did someone make you touch their body in a sexual way when you did not want them to? (n = 177)                        | 86.4%       | 13.6%          |
| When you were growing up, how often did someone actually have oral, anal, or vaginal intercourse when you did not want them to? (n = 181)                 | 83.4%       | 16.6%          |

Table 2 displays results of OLS regression analyses. As hypothesized (H1), across all models and controlling for gender, age, and income, ACEs were negatively associated with mental and physical health. Also as hypothesized (H2), involvement in spiritual activities, stronger awareness of connectedness, social support, and diabetes-specific support were all positively and significantly associated with self-reported mental and physical health in these models.

**Table 2: Results from Ordinary Least Squares Regression Analyses**

|                            | Mental Health    |               | Physical Health  |               | Mental Health    |                        | Physical Health  |               | Mental Health    |                         | Physical Health  |                         | Mental Health    |              | Physical Health  |                         |
|----------------------------|------------------|---------------|------------------|---------------|------------------|------------------------|------------------|---------------|------------------|-------------------------|------------------|-------------------------|------------------|--------------|------------------|-------------------------|
|                            | B (SE)           | $\beta$       | B (SE)           | $\beta$       | B (SE)           | $\beta$                | B (SE)           | $\beta$       | B (SE)           | $\beta$                 | B (SE)           | $\beta$                 | B (SE)           | $\beta$      | B (SE)           | $\beta$                 |
| Age                        | -.01(.01)        | -.08          | -.00(.01)        | -.03          | -.01(.01)        | -.09                   | -.00(.01)        | -.04          | -.01(.01)        | -.06                    | -.00(.01)        | -.02                    | -.01(.01)        | -.07         | -.00(.01)        | -.01                    |
| Gender                     | -.15(.15)        | -.07          | -.02(.13)        | -.01          | -.15(.14)        | -.08                   | -.02(.13)        | -.01          | <b>-.23(.14)</b> | <b>-.12<sup>†</sup></b> | -.05(.13)        | -.03                    | -.13(.15)        | -.07         | .05(.13)         | .03                     |
| Per Capita HH Income       | <b>.02(.01)</b>  | <b>.22**</b>  | <b>.02(.01)</b>  | <b>.18*</b>   | <b>.02(.01)</b>  | <b>.20**</b>           | <b>.02(.01)</b>  | <b>.15*</b>   | <b>.02(.01)</b>  | <b>.15*</b>             | <b>.01(.01)</b>  | <b>.14<sup>†</sup></b>  | <b>.02(.01)</b>  | <b>.20*</b>  | <b>.01(.01)</b>  | <b>0.15<sup>†</sup></b> |
| ACEs                       | <b>-.09(.03)</b> | <b>-.23**</b> | <b>-.08(.03)</b> | <b>-.22**</b> | <b>-.08(.03)</b> | <b>-.20**</b>          | <b>-.07(.03)</b> | <b>-.20**</b> | <b>-.06(.03)</b> | <b>-.16*</b>            | <b>-.06(.03)</b> | <b>-.17*</b>            | <b>-.07(.30)</b> | <b>-.18*</b> | <b>-.06(.03)</b> | <b>-.17*</b>            |
| Spiritual Activities       | <b>.06(.03)</b>  | <b>.15*</b>   | .03(.03)         | .07           |                  |                        |                  |               |                  |                         |                  |                         |                  |              |                  |                         |
| Awareness of Connectedness |                  |               |                  |               | <b>.07(.03)</b>  | <b>.18<sup>†</sup></b> | <b>.08(.03)</b>  | <b>.23**</b>  |                  |                         |                  |                         |                  |              |                  |                         |
| Social Support             |                  |               |                  |               |                  |                        |                  |               | <b>.50(.10)</b>  | <b>.35***</b>           | <b>.27(.10)</b>  | <b>.20**</b>            |                  |              |                  |                         |
| Support x ACEs             |                  |               |                  |               |                  |                        |                  |               |                  |                         | <b>-.07(.04)</b> | <b>-.14<sup>†</sup></b> |                  |              |                  |                         |
| Diabetes Specific Support  |                  |               |                  |               |                  |                        |                  |               |                  |                         |                  |                         | .03(.02)         | .10          | <b>.06(.02)</b>  | <b>.21**</b>            |
| Diabetes Support x ACEs    |                  |               |                  |               |                  |                        |                  |               |                  |                         |                  |                         |                  |              | <b>-.02(.01)</b> | <b>-.15*</b>            |

\*\*\*p  $\leq$  .001; \*\*p  $\leq$  .01; \*p  $\leq$  .05, <sup>†</sup>p  $\leq$  .10; two-tailed tests

We included interaction terms for each of the protective factors by ACEs for all independent variables; two of these emerged as statistically significant and are plotted in Figure 1 and Figure 2. As shown and in partial support of the third hypothesis (H3), social support and diabetes-specific support moderated the negative associations between ACEs and physical health. More specifically, physical health ratings were highest (better) for those reporting high support and low ACEs. Even when reporting higher ACEs, those in high support contexts still had better self-reported physical health than those with lower ACE scores but less supportive environments.

INSERT FIGURE 1 and FIGURE 2 HERE

## DISCUSSION

1  
2  
3  
4  
5  
6 Approximately 82% of this AI sample reported experiencing at least one ACE. Although  
7  
8 caution is necessary in comparing rates across studies due to measurement variability, our finding is  
9  
10 much higher compared to the less than two-thirds of adults who report one or more ACE among 10  
11  
12 states and Washington, DC.<sup>32</sup> Our estimate of this Midwest AI sample more closely mirrors the 78.1%  
13  
14 minimum exposure rate reported by adolescent AIs on one northern plains reservation <sup>7</sup> and the 86% of  
15  
16 participants in a seven tribe study.<sup>33</sup>  
17  
18

19 As hypothesized, self-rated physical and mental health were negatively associated with ACEs  
20  
21 for this sample of adults managing T2D, a complex chronic disease. This is not surprising given what  
22  
23 is known from the general literature on ACEs and health outcomes.<sup>34-36</sup> As many AI/ANs exhibit  
24  
25 drastic health disparities, these conclusions are useful to public health and tribal health systems for  
26  
27 consideration in long-term diabetes reduction strategies. Primary and secondary prevention efforts  
28  
29 targeting ACE exposures and intermediate health outcomes (e.g. behavioral health), respectively, may  
30  
31 reduce the prevalence of T2D within Tribal communities.  
32  
33  
34

35 Better physical health was associated with spiritual activity involvement, family, community  
36  
37 and nature connectedness, social support, and diabetes-specific support, even when accounting for  
38  
39 ACEs and control variables. We advance the literature by documenting protective associations  
40  
41 between Indigenous cultural factors (i.e., involvement in spiritual activities and awareness of  
42  
43 connectedness) and health that persist even when accounting for ACE exposures and demographic  
44  
45 variables. Cultural connectedness, social support, and traditional practices as wellness promoting  
46  
47 factors are widely understood within Tribal communities. Therefore, this research supports Indigenous  
48  
49 knowledges and underscores the critical importance of “a community-based prevention approach [that]  
50  
51  
52  
53  
54  
55  
56  
57  
58  
59  
60

1  
2  
3 recognizes the inherent knowledge of community members and their expertise.<sup>37</sup> We provide evidence  
4  
5 that this approach should extend to treatment and management of chronic diseases like T2D.  
6

7  
8 While social support has a well-documented positive impact on patients with diabetes,<sup>38-40</sup> we  
9  
10 add to this literature by demonstrating that adult support appears to moderate the negative effects of  
11  
12 childhood adversities among AIs. That is, our findings suggest that adulthood social support networks  
13  
14 may buffer the harmful impact of ACEs on health. This includes diabetes-specific support for AIs  
15  
16 diagnosed with T2D, and diabetes interventions promoting socially supportive environments may  
17  
18 prove useful for better prognosis.  
19  
20

### 21 *Limitations*

22  
23  
24 This study has several limitations that need to be considered. First, retrospective ACE studies  
25  
26 may involve systematic error such as recall bias and false negative findings.<sup>41</sup> Important measurement  
27  
28 and methodology differences hamper our ability to draw firm conclusions about the prevalence of  
29  
30 AI/AN ACEs shown here and those documented nationally. Nevertheless, our findings demonstrate in  
31  
32 particular may promote health by ameliorating the negative impact of ACEs for AIs. Given variability  
33  
34 in the types and severity of ACEs potentially experienced across cultures and community context, our  
35  
36 estimates may be conservative and underscores the importance of culturally meaningful ACE and  
37  
38 placed-based assessments.<sup>7</sup> Future research should include identification of specific forms and types of  
39  
40 childhood stressors that are particularly harmful to Native people, including measurement development  
41  
42 for AI communities.  
43  
44  
45

### 46 **CONCLUSIONS**

47  
48  
49 For health professionals, this research underscores the importance of life-course histories and  
50  
51 the lingering impact of childhood experiences on adult AI wellbeing. Diabetes care providers in  
52  
53 particular should consider strategies for promoting help-seeking skills and social belonging for  
54  
55  
56  
57  
58  
59  
60

1  
2  
3 patients, particularly among those reporting a multitude of childhood adversities. Mental health  
4  
5 professionals should encourage the building of social networks and cultural activity participation for  
6  
7 AI patients interested in these outlets. Supporting and encouraging AI diabetes patients who wish to  
8  
9 seek and engage in cultural and social activities may prove beneficial in promoting physical and  
10  
11 mental health.  
12  
13  
14  
15  
16  
17  
18  
19  
20  
21  
22  
23  
24  
25  
26  
27  
28  
29  
30  
31  
32  
33  
34  
35  
36  
37  
38  
39  
40  
41  
42  
43  
44  
45  
46  
47  
48  
49  
50  
51  
52  
53  
54  
55  
56  
57  
58  
59  
60

## References

1. Anda RF, Whitfield CL, Felitti VJ, et al. Adverse childhood experiences, alcoholic parents, and later risk of alcoholism and depression. *Psychiatr Serv*. 2002;53(8):1001-1009. <http://dx.doi.org/10.1176/appi.ps.53.8.1001>.
2. Dube SR, Anda RF, Felitti VJ, Chapman DP, Williamson DF, Giles WH. Childhood abuse, household dysfunction, and the risk of attempted suicide throughout the life span: findings from the Adverse Childhood Experiences Study. *JAMA*. 2001;286(24):3089-3096.
3. Dube SR, Anda RF, Felitti VJ, Edwards VJ, Croft JB. Adverse childhood experiences and personal alcohol abuse as an adult. *Addict Behav*. 2002;27(5):713-725.
4. Dube SR, Anda RF, Felitti VJ, Edwards VJ, Williamson DF. Exposure to abuse, neglect, and household dysfunction among adults who witnessed intimate partner violence as children: implications for health and social services. *Violence Vict*. 2002;17(1):3-17.
5. Dube SR, Felitti VJ, Dong M, Chapman DP, Giles WH, Anda RF. Childhood abuse, neglect, and household dysfunction and the risk of illicit drug use: the Adverse Childhood Experiences Study. *Pediatrics*. 2003;111(3):564-572.
6. Felitti VJ, Anda RF, Nordenberg D, et al. Relationship of childhood abuse and household dysfunction to many of the leading causes of death in adults. The Adverse Childhood Experiences (ACE) Study. *Am J Prev Med*. 1998;14(4):245-258.
7. Brockie TN, Dana-Sacco G, Wallen GR, Wilcox HC, Campbell JC. The relationship of adverse childhood experiences to PTSD, depression, poly-drug use and suicide attempt in reservation-based Native American adolescents and young adults. *Am J Community Psychol*. 2015;55(3-4):411-421. <http://doi.org/10.1007/s10464-015-9721-3>.
8. Yuan NP, Koss MP, Polacca M, Goldman D. Risk factors for physical assault and rape among six Native American tribes [published online ahead of print, December 1, 2006]. *J Interpers Violence*. 2006;21(12):1566-1590. <http://dx.doi.org/10.1177/088626050629423>.
9. Felitti VJ. Adverse childhood experiences and adult health [published online ahead of print, April 9, 2009]. *Acad Pediatr*. 2009;9(3):131-132. <http://dx.doi.org/10.1016/j.acap.2009.03.001>.
10. Dong M, Anda RF, Felitti VJ, et al. The interrelatedness of multiple forms of childhood abuse, neglect, and household dysfunction. *Child Abuse Negl*. 2004;28(7):771-784. <http://dx.doi.org/10.1016/j.chiabu.2004.01.008>.
11. Kenney MK, Singh GK. Adverse childhood experiences among American Indian/Alaska Native children: The 2011-2012 National Survey of Children's Health [published online ahead of print, July 26, 2016]. *Scientifica (Cairo)*. 2016;2016:7424239. <http://dx.doi.org/10.1155/2016/7424239>.
12. Jiang L, Beals J, Whitesell NR, Roubideaux Y, Manson SM, Team A-S. Stress burden and diabetes in two American Indian reservation communities. [published online ahead of print, December 10, 2007]. *Diabetes Care*. 2008;31(3):427-429. <http://dx.doi.org/10.2337/dc07-2044>.
13. Burnette CE, Roh S, Lee KH, Lee YS, Newland LA, Jun JS. A comparison of risk and protective factors related to depressive symptoms among American Indian and Caucasian older adults [published online ahead of print, February 1, 2017]. *Health Soc Work*. 2017;42(1):e15-e23. <http://dx.doi.org/10.1093/hsw/hlw055>.
14. Roh S, Burnette CE, Lee KH, Lee YS, Easton SD, Lawler MJ. Risk and protective factors for depressive symptoms among American Indian older adults: adverse childhood experiences and social support [published online ahead of print, July 29, 2014]. *Aging Ment Health*. 2015;19(4):371-380. <http://dx.doi.org/10.1080/13607863.2014.938603>.



15. Center for Disease Control and Prevention. National Diabetes Statistics Report.  
<https://www.cdc.gov/diabetes/pdfs/data/statistics/national-diabetes-statistics-report.pdf>.  
Published 2017.
16. West KM. Diabetes in American Indians and other native populations of the New World. *Diabetes*. 1974;23(10):841-855.
17. Cheong EV, Sinnott C, Dahly D, Kearney PM. Adverse childhood experiences (ACEs) and later-life depression: perceived social support as a potential protective factor [published online ahead of print, September 1, 2017]. *BMJ Open*. 2017;7(9):e013228.  
<http://dx.doi.org/10.1136/bmjopen-2016-013228>.
18. Center on the Developing Child. The Science of Resilience (In Brief).  
<https://developingchild.harvard.edu/resources/inbrief-the-science-of-resilience>.  
Published 2015.
19. Pollard JA, Hawkins JD, Arthur MW. Risk and protection: are both necessary to understand diverse behavioral outcomes in adolescence? *Soc Work Res*. 1999;23(3):145–158.
20. Allen J, Hopper K, Wexler L, Kral M, Rasmus S, Nystad K. Mapping resilience pathways of Indigenous youth in five circumpolar communities [published online ahead of print, August 21, 2013]. *Transcult Psychiatry*. 2014;51(5):601-631.  
<http://dx.doi.org/10.1177/1363461513497232>.
21. Khanlou N, Wray R. A whole community approach toward child and youth resilience promotion: a review of resilience literature [published online ahead of print, January 15, 2014]. *Int J Ment Health Addict*. 2014;12(1):64-79. <http://dx.doi.org/10.1007/s11469-013-9470-1>.
22. Southwick SM, Bonanno GA, Masten AS, Panter-Brick C, Yehuda R. Resilience definitions, theory, and challenges: interdisciplinary perspectives [published online ahead of print, October 1, 2014]. *Eur J Psychotraumatol*. 2014;5(1). <http://dx.doi.org/10.3402/ejpt.v5.25338>.
23. Nurius PS, Logan-Greene P, Green S. Adverse childhood experiences (ACE) within a social disadvantage framework: distinguishing unique, cumulative, and moderated contributions to adult mental health [published online ahead of print, September 12, 2012]. *J Prev Interv Community*. 2012;40(4):278-290 <http://dx.doi.org/10.1080/10852352.2012.707443>.
24. Elm JH, Lewis JP, Walters KL, Self JM. "I'm in this world for a reason": resilience and recovery among American Indian and Alaska Native two-spirit women [published online ahead of print, June 2, 2016]. *J Lesbian Stud*. 2016;20(3-4):352-371.  
<http://dx.doi.org/10.1080/10894160.2016.1152813>.
25. Alacántara C, Joseph P. Reviewing suicide in Native American communities: situating risk and protective factors within a transactional–ecological framework. *Death Stud*. 2007;31:457-477.
26. Walters KL, Simoni JM. Reconceptualizing native women's health: an "indigenist" stress-coping model. *Am J Public Health*. 2002;92(4):520-524.
27. Henson M, Sabo S, Trujillo A, Teufel-Shone N. Identifying protective factors to promote health in American Indian and Alaska Native adolescents: a literature review. *J Prim Prev*. 2017;38(1-2):5-26. <http://dx.doi.org/10.1007/s10935-016-0455-2>.
28. Borowsky I, Resnick MD, Ireland M, Blum R. Suicide attempts among American Indian and Alaska Native youth: risk and protective factors. *Arch Pediatr Adolesc Med*. 1999;153(6):573-580.
29. Shakespeare-Finch J, Obst PL. The development of the 2-Way Social Support Scale: a measure of giving and receiving emotional and instrumental support [published online ahead of print, August 22, 2011]. *J Pers Assess*. 2011;93(5):483-490.  
<http://dx.doi.org/10.1080/00223891.2011.594124>.

- 1  
2  
3  
4  
5  
6  
7  
8  
9  
10  
11  
12  
13  
14  
15  
16  
17  
18  
19  
20  
21  
22  
23  
24  
25  
26  
27  
28  
29  
30  
31  
32  
33  
34  
35  
36  
37  
38  
39  
40  
41  
42  
43  
44  
45  
46  
47  
48  
49  
50  
51  
52  
53  
54  
55  
56  
57  
58  
59  
60
30. Fitzgerald JT, Davis WK, Connell CM, Hess GE, Funnell MM, Hiss RG. Development and validation of the Diabetes Care Profile. *Eval Health Prof.* 1996;19(2):208-230. <http://dx.doi.org/10.1177/016327879601900205>.
  31. Mohatt NV, Fok CC, Burket R, Henry D, Allen J. Assessment of awareness of connectedness as a culturally-based protective factor for Alaska native youth. *Cultur Divers Ethnic Minor Psychol.* 2011;17(4):444-455. <http://dx.doi.org/10.1037/a0025456>.
  32. Centers for Disease Control and Prevention. Behavioral Risk Factor Surveillance System Survey ACE Module Data, 2010. from <https://www.cdc.gov/violenceprevention/acestudy>. Published 2015.
  33. Koss MP, Yuan NP, Dightman D, et al. Adverse childhood exposures and alcohol dependence among seven Native American tribes [published online ahead of print, October 25, 2003]. *Am J Prev Med.* 2003;25(3):238-244. [http://dx.doi.org/10.1016/S0749-3797\(03\)00195-8](http://dx.doi.org/10.1016/S0749-3797(03)00195-8).
  34. Huang H, Yan P, Shan Z, et al. Adverse childhood experiences and risk of type 2 diabetes: a systematic review and meta-analysis. *Metabolism.* 2015;64(11):1408-1418. <http://dx.doi.org/10.1016/j.metabol.2015.08.019>.
  35. Nurius PS, Fleming CM, Brindle E. Life Course Pathways From Adverse Childhood Experiences to Adult Physical Health: A Structural Equation Model. *J Aging Health.* 2017;89826431772644. doi:10.1177/0898264317726448.
  36. Chapman DP, Whitfield CL, Felitti VJ, Dube SR, Edwards VJ, Anda RF. Adverse childhood experiences and the risk of depressive disorders in adulthood [published online ahead of print, October 15, 2004]. *J Affect Disord.* 2004;82(2):217-225. <http://dx.doi.org/10.1016/j.jad.2003.12.013>.
  37. Israel BA, Coombe CM, Cheezum RR, et al. Community-based participatory research: a capacity-building approach for policy advocacy aimed at eliminating health disparities. *Am J Public Health.* 2010;100(11):2094-2102. <http://dx.doi.org/10.2105/Ajph.2009.170506>.
  38. Gomes LC, Coelho ACM, Gomides DDS, Foss-Freitas MC, Foss MC, Pace AE. Contribution of family social support to the metabolic control of people with diabetes mellitus: a randomized controlled clinical trial. *Appl Nurs Res.* 2017;36:68-76. <http://dx.doi.org/10.1016/j.apnr.2017.05.009>.
  39. Laursen KR, Hulman A, Witte DR, Terkildsen Maindal H. Social relations, depressive symptoms, and incident type 2 diabetes mellitus: the English Longitudinal Study of Ageing. *Diabetes Res Clin Pract.* 2017;126:86-94. <http://dx.doi.org/10.1016/j.diabres.2017.01.006>.
  40. Dill EJ, Manson SM, Jiang L, et al. Psychosocial predictors of weight loss among American Indian and Alaska Native participants in a diabetes prevention translational project. *J Diabetes Res.* 2016;2016:1546939. <http://dx.doi.org/10.1155/2016/1546939>.
  41. Hardt, J, Rutter, M. Validity of adult retrospective reports of adverse childhood experiences: review of the evidence. *J Child Psychol Psychiatry.* 2004;45(2):260-273.

**Acknowledgements:**

The authors gratefully acknowledge the clinical and community-based members of the Gathering for Health Team: Sidnee Kellar, Rose Barber, Robert Miller, Tweed Shuman, Lorraine Smith, Sandy Zeznanski, Patty Subera, Tracy Martin, Geraldine Whiteman, Lisa Perry, Trisha Prentice, Alexis Mason, Charity Prentice-Pemberton, Kathy Dudley, Romona Nelson, Eileen Miller, Geraldine Brun, Murphy Thomas, Mary Sikora-Petersen, Tina Handeland, GayeAnn Allen, Frances Whitfield, Phillip Chapman, Sr., Sonya Psuik, Hope Williams, Betty Jo Graveen, Daniel Chapman, Jr., Doris Isham, Stan Day, Jane Villebrun, Beverly Steel, Muriel Deegan, Peggy Connor, Michael Connor, Ray E. Villebrun, Sr., Pam Hughes, Cindy McDougall, Melanie McMichael, Robert Thompson, and Sandra Kier.

This study was funded by the National Institute of Diabetes and Digestive and Kidney Diseases of the National Institutes of Health under Award Number DK091250 (M. Walls, PI). The contents of this manuscript are attributable to the authors and do not necessarily represent the viewpoints of the NIH.

No financial disclosures were reported by any of the authors of this paper.

**Data Sharing Statement:** No additional data sharing available.

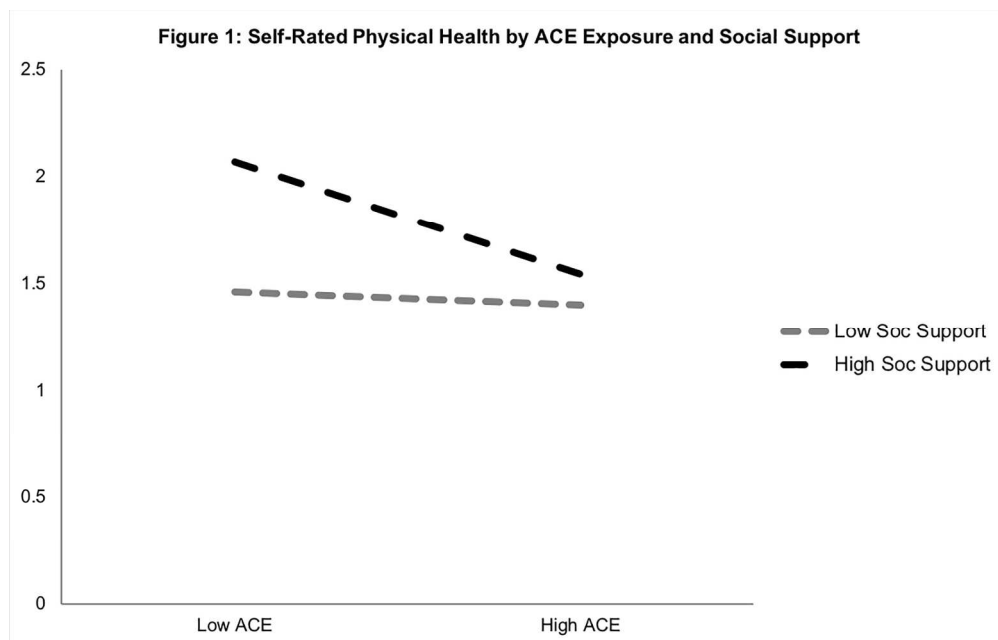

Figure 1

809x514mm (72 x 72 DPI)

1  
2  
3  
4  
5  
6  
7  
8  
9  
10  
11  
12  
13  
14  
15  
16  
17  
18  
19  
20  
21  
22  
23  
24  
25  
26  
27  
28  
29  
30  
31  
32  
33  
34  
35  
36  
37  
38  
39  
40  
41  
42  
43  
44  
45  
46  
47  
48  
49  
50  
51  
52  
53  
54  
55  
56  
57  
58  
59  
60

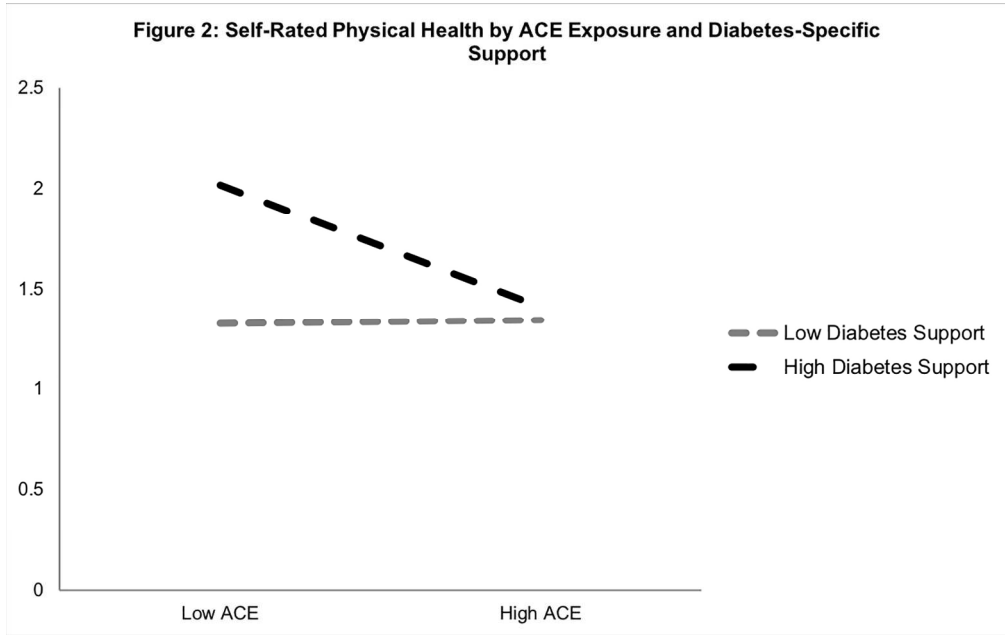

Figure 2  
791x499mm (72 x 72 DPI)

view only

## STROBE Statement—checklist of items that should be included in reports of observational studies

|                              | Item No | Recommendation                                                                                                                                                                                                                                                                                                                                                                                                                                                                                                                                                                                                                                                                                            |
|------------------------------|---------|-----------------------------------------------------------------------------------------------------------------------------------------------------------------------------------------------------------------------------------------------------------------------------------------------------------------------------------------------------------------------------------------------------------------------------------------------------------------------------------------------------------------------------------------------------------------------------------------------------------------------------------------------------------------------------------------------------------|
| <b>Title and abstract</b>    | 1       | (a) Indicate the study's design with a commonly used term in the title or the abstract. X Page 1<br>(b) Provide in the abstract an informative and balanced summary of what was done and what was found X Page 2                                                                                                                                                                                                                                                                                                                                                                                                                                                                                          |
| <b>Introduction</b>          |         |                                                                                                                                                                                                                                                                                                                                                                                                                                                                                                                                                                                                                                                                                                           |
| Background/rationale         | 2       | Explain the scientific background and rationale for the investigation being reported X Pages 4-6                                                                                                                                                                                                                                                                                                                                                                                                                                                                                                                                                                                                          |
| Objectives                   | 3       | State specific objectives, including any prespecified hypotheses Page 6                                                                                                                                                                                                                                                                                                                                                                                                                                                                                                                                                                                                                                   |
| <b>Methods</b>               |         |                                                                                                                                                                                                                                                                                                                                                                                                                                                                                                                                                                                                                                                                                                           |
| Study design                 | 4       | Present key elements of study design early in the paper X Page 2 & 6-8                                                                                                                                                                                                                                                                                                                                                                                                                                                                                                                                                                                                                                    |
| Setting                      | 5       | Describe the setting, locations, and relevant dates, including periods of recruitment, exposure, follow-up, and data collection X Pages 6 -8                                                                                                                                                                                                                                                                                                                                                                                                                                                                                                                                                              |
| Participants                 | 6       | (a) <i>Cohort study</i> —Give the eligibility criteria, and the sources and methods of selection of participants. Describe methods of follow-up<br><i>Case-control study</i> —Give the eligibility criteria, and the sources and methods of case ascertainment and control selection. Give the rationale for the choice of cases and controls<br><i>Cross-sectional study</i> —Give the eligibility criteria, and the sources and methods of selection of participants X Page 7<br>(b) <i>Cohort study</i> —For matched studies, give matching criteria and number of exposed and unexposed<br><i>Case-control study</i> —For matched studies, give matching criteria and the number of controls per case |
| Variables                    | 7       | Clearly define all outcomes, exposures, predictors, potential confounders, and effect modifiers. Give diagnostic criteria, if applicable X Pages 7 -8                                                                                                                                                                                                                                                                                                                                                                                                                                                                                                                                                     |
| Data sources/<br>measurement | 8*      | For each variable of interest, give sources of data and details of methods of assessment (measurement). Describe comparability of assessment methods if there is more than one group X Pages 7 -8                                                                                                                                                                                                                                                                                                                                                                                                                                                                                                         |
| Bias                         | 9       | Describe any efforts to address potential sources of bias see Page 12                                                                                                                                                                                                                                                                                                                                                                                                                                                                                                                                                                                                                                     |
| Study size                   | 10      | Explain how the study size was arrived at X Page 7                                                                                                                                                                                                                                                                                                                                                                                                                                                                                                                                                                                                                                                        |
| Quantitative variables       | 11      | Explain how quantitative variables were handled in the analyses. If applicable, describe which groupings were chosen and why X Page 8                                                                                                                                                                                                                                                                                                                                                                                                                                                                                                                                                                     |
| Statistical methods          | 12      | (a) Describe all statistical methods, including those used to control for confounding X Page 8<br>(b) Describe any methods used to examine subgroups and interactions X Pgs 8-10<br>(c) Explain how missing data were addressed X Page 7<br>(d) <i>Cohort study</i> —If applicable, explain how loss to follow-up was addressed<br><i>Case-control study</i> —If applicable, explain how matching of cases and controls was addressed<br><i>Cross-sectional study</i> —If applicable, describe analytical methods taking account of sampling strategy X Page 6-8<br>(e) Describe any sensitivity analyses N/A                                                                                             |

Continued on next page

**Results**

|                  |     |                                                                                                                                                                                                                                                                                                                                                                                                                                 |
|------------------|-----|---------------------------------------------------------------------------------------------------------------------------------------------------------------------------------------------------------------------------------------------------------------------------------------------------------------------------------------------------------------------------------------------------------------------------------|
| Participants     | 13* | (a) Report numbers of individuals at each stage of study—eg numbers potentially eligible, examined for eligibility, confirmed eligible, included in the study, completing follow-up, and analysed X Page 7<br>(b) Give reasons for non-participation at each stage N/A<br>(c) Consider use of a flow diagram N/A                                                                                                                |
| Descriptive data | 14* | (a) Give characteristics of study participants (eg demographic, clinical, social) and information on exposures and potential confounders X Page 8<br>(b) Indicate number of participants with missing data for each variable of interest X Page 8-9<br>(c) <i>Cohort study</i> —Summarise follow-up time (eg, average and total amount)                                                                                         |
| Outcome data     | 15* | <i>Cohort study</i> —Report numbers of outcome events or summary measures over time<br><i>Case-control study</i> —Report numbers in each exposure category, or summary measures of exposure<br><i>Cross-sectional study</i> —Report numbers of outcome events or summary measures X Page 9                                                                                                                                      |
| Main results     | 16  | (a) Give unadjusted estimates and, if applicable, confounder-adjusted estimates and their precision (eg, 95% confidence interval). Make clear which confounders were adjusted for and why they were included X page 10<br>(b) Report category boundaries when continuous variables were categorized N/A<br>(c) If relevant, consider translating estimates of relative risk into absolute risk for a meaningful time period N/A |
| Other analyses   | 17  | Report other analyses done—eg analyses of subgroups and interactions, and sensitivity analyses X Page 10                                                                                                                                                                                                                                                                                                                        |

**Discussion**

|                  |    |                                                                                                                                                                                         |
|------------------|----|-----------------------------------------------------------------------------------------------------------------------------------------------------------------------------------------|
| Key results      | 18 | Summarise key results with reference to study objectives X Pages 9-12                                                                                                                   |
| Limitations      | 19 | Discuss limitations of the study, taking into account sources of potential bias or imprecision. Discuss both direction and magnitude of any potential bias X Page 12                    |
| Interpretation   | 20 | Give a cautious overall interpretation of results considering objectives, limitations, multiplicity of analyses, results from similar studies, and other relevant evidence X Page 12-13 |
| Generalisability | 21 | Discuss the generalisability (external validity) of the study results X Page 12                                                                                                         |

**Other information**

|         |    |                                                                                                                                                                         |
|---------|----|-------------------------------------------------------------------------------------------------------------------------------------------------------------------------|
| Funding | 22 | Give the source of funding and the role of the funders for the present study and, if applicable, for the original study on which the present article is based X Page 17 |
|---------|----|-------------------------------------------------------------------------------------------------------------------------------------------------------------------------|

# BMJ Open

## Examining Protective and Buffering Effects of Social and Cultural Factors on Adverse Childhood Experiences among American Indian Adults with Type 2 Diabetes: A Quantitative, Community-Based Participatory Research Approach

|                                 |                                                                                                                                                                                         |
|---------------------------------|-----------------------------------------------------------------------------------------------------------------------------------------------------------------------------------------|
| Journal:                        | <i>BMJ Open</i>                                                                                                                                                                         |
| Manuscript ID                   | bmjopen-2018-022265.R1                                                                                                                                                                  |
| Article Type:                   | Research                                                                                                                                                                                |
| Date Submitted by the Author:   | 22-Jun-2018                                                                                                                                                                             |
| Complete List of Authors:       | Brockie, Teresa; Johns Hopkins University, Community Public Health Nursing<br>Elm, Jessica; University of Washington, School of Social Work<br>Walls, Melissa; University of Minnesota, |
| <b>Primary Subject Heading</b>: | Public health                                                                                                                                                                           |
| Secondary Subject Heading:      | Diabetes and endocrinology, General practice / Family practice, Patient-centred medicine, Public health, Sociology                                                                      |
| Keywords:                       | Adverse Childhood Experiences, ACEs, American Indians, Type 2 Diabetes, Culture                                                                                                         |
|                                 |                                                                                                                                                                                         |

SCHOLARONE™  
Manuscripts

only



1  
2  
3 **Examining Protective and Buffering Effects of Social and Cultural Factors on Adverse**  
4 **Childhood Experiences among American Indian Adults with Type 2 Diabetes: A Quantitative,**  
5 **Community-Based Participatory Research Approach**  
6  
7

8 Teresa N. Brockie, PhD, RN, FAAN  
9 Assistant Professor  
10 Community Public Health Nursing  
11 Johns Hopkins School of Nursing  
12 525 N. Wolfe Street Room 440  
13 Baltimore, MD 21205  
14 [tbrocki1@jhu.edu](mailto:tbrocki1@jhu.edu)  
15

16  
17 Jessica H. L. Elm, MSW  
18 University of Washington  
19 School of Social Work  
20 Seattle, WA  
21 [jelm@uw.edu](mailto:jelm@uw.edu)  
22

23  
24 **Corresponding Author:** Melissa L. Walls, PhD  
25 Associate Professor  
26 Department of Biobehavioral Health & Population Sciences  
27 University of Minnesota Medical School, Duluth campus  
28 1035 University Drive  
29 235 Smed  
30 Duluth, MN 55812  
31 218-726-8367  
32 [mlwalls@d.umn.edu](mailto:mlwalls@d.umn.edu)  
33  
34

35 **Word count:** 3274  
36

37  
38 **Conflict of interest and funding statement:**

39 The Maawaji' idi-oog Mino-ayaawin (Gathering for Health) project is a community-based  
40 participatory research (CBPR) collaboration between the University of Minnesota Medical  
41 School, Duluth campus and five Ojibwe communities. This study was funded by the National  
42 Institute of Diabetes and Digestive and Kidney Diseases of the National Institutes of Health under  
43 Award Number DK091250 (M. Walls, PI). The contents of this manuscript are attributable to the  
44 authors and do not necessarily represent the viewpoints of the NIH.  
45

46 **Financial disclosure:**

47 No financial disclosures were reported by any of the authors of this paper.

48 **Author Statement of Contributions:**

49 T.B. was responsible for drafting the literature review, discussion and conclusions sections. J.E. edited  
50 and added substantive content to the manuscript. M.W. performed data analyses and drafted methods  
51 and results sections and oversaw data collection. All authors reviewed the final version of the  
52 manuscript.  
53

54 **Key Words:** Adverse Childhood Experiences, ACEs, American Indians, Type 2 Diabetes, Culture  
55  
56  
57  
58  
59

## Abstract

### Objectives:

The purpose of this study was to determine the frequency of select Adverse Childhood Experiences (ACEs) among a sample of American Indian adults living with type 2 diabetes and the impact of ACEs on health. We also examined protective effects of socio-cultural factors on physical and mental health, including possible buffering effects.

### Design:

Survey data for this observational study was collected using computer assisted survey interviewing techniques between 2013 – 2015.

### Setting:

Participants were randomly selected from American Indian tribal clinic facilities on five reservations in the upper Midwestern United States.

### Participants:

Inclusion criteria were a diagnosis of type 2 diabetes, age 18 years or older, and self-identified as AI. The sample includes N=192 adults (55.7% female; mean age = 46.3 years).

### Primary Measures:

We assessed nine ACEs related to household dysfunction, violence, and emotional, physical, or sexual abuse. Independent variables included social support, diabetes support, and two cultural factors: spiritual activities and connectedness. Primary outcomes were self-rated physical and mental health.

### Results:

An average of 3.05 ACEs were reported by participants and 81.9% (n = 149) said they had experienced at least one ACE. Controlling for gender, age, and income, ACEs were negatively associated with self-rated mental and physical health ( $p < .05$ ). Involvement in spiritual activities, social support, and diabetes support were all positively, significantly associated with mental and physical health. Social support variables moderated the impact of ACEs on physical health.

### Conclusions:

This research demonstrates the negative impact of ACEs on adult AI diabetes patient wellbeing. The findings further demonstrate the promise of social and cultural integration as a critical component of wellness, a point of relevance for all cultures. Health professionals can use findings from this study to augment their assessment of patients and guide them to health-promoting social support services and resources for cultural involvement.

## ARTICLE SUMMARY

### Strengths and Limitations of this Study:

- This is the first quantitative observational study of which we are aware to examine American Indian adult cultural and social protective factors in the face of earlier life adversities and their potential moderating relationship between Adverse Childhood Experiences (ACEs) and adult self-rated mental and physical health.
- Study scope and methodology was developed using community-based participatory research principles to promote authentic researcher/community member collaboration.
- We contribute to a limited body of literature on ACEs and American Indian health by assessing ACE exposure and correlates for a clinical sample of Native adults.
- We rely on retrospective reports of ACEs that may involve systematic error including recall bias that should be considered when interpreting findings.

## INTRODUCTION

Adverse childhood experiences (ACEs) are early life stressful situations or traumatic events that often co-occur, and potent determinants of health linked to increased morbidity and mortality across the life course.<sup>1-9</sup> The foundational Centers for Disease Control and Prevention (CDC) Kaiser Permanente ACEs retrospective adult studies (Kaiser/CDC studies) identified a set of eight to ten childhood stressors including childhood emotional, physical, and sexual abuse, emotional and physical neglect, witnessing intimate partner violence, parental separation, and living with a substance abusing, mentally ill, or criminal household member.<sup>5,6</sup> These childhood stressors have been shown to correspond with later life outcomes, such as Type 2 Diabetes (T2D), substance abuse, and suicide attempts, with graded, positive relationships between the number of ACE exposures and risk for health outcomes.<sup>5,6,10</sup> Adaptations of the Kaiser/CDC measures across settings have expanded ACE criteria to include, for example, peer isolation and rejection,<sup>11</sup> peer victimization,<sup>12</sup> and community level indicators like community violence<sup>12</sup> and poverty.<sup>13</sup> In the absence of protective factors, existing evidence suggests that early trauma and toxic stress can have lasting effects on physical and mental health.<sup>3,5,6,11</sup>

The emerging literature on ACEs among the American Indian/Alaska Native (AI/AN) population has identified disproportionately high rates of ACEs and childhood stressors that are associated with multiple health outcomes including suicidality,<sup>7</sup> substance misuse,<sup>8</sup> diabetes,<sup>14</sup> and worse mental health including depressive symptoms.<sup>15-16</sup> There is also movement to identify ACEs appropriate for AI/AN culture and context, such as historical loss associated symptoms and discrimination<sup>7</sup>. Elevated and unique experiences with ACEs offer explanation for the pronounced health inequities experienced by AI/AN communities, including heightened rates of T2D. For example, data from 2013-2015 indicated adult overall prevalence of T2D for AI/ANs was 15.1%, versus 7.4%

1  
2  
3 for non-Hispanic whites.<sup>17</sup> Further, T2D represents a modern epidemic among AI/ANs, especially  
4  
5 considering that prior to the 1940's the diagnosis was relatively uncommon for this demographic.<sup>18</sup>  
6  
7

8 In the wake of such compelling evidence that ACEs can lead to serious health consequences,  
9  
10 researchers have begun identifying factors that may provide a protective effect against ACE impacts.<sup>19</sup>  
11  
12 One way in which protective factors operate is through the fostering, building, and exertion of  
13  
14 resilience as an ability to overcome significant life stressors.<sup>20-24</sup> In a US sample, factors such as sense  
15  
16 of community have been shown to have direct and indirect protective effects on ACEs, including  
17  
18 moderating roles for the impact of ACEs on adult mental health.<sup>25</sup>  
19  
20

21 Resilience promotion is not a new concept within Tribal communities. AI/ANs have  
22  
23 longstanding traditional knowledges that include instructions on how to stay well and thrive, and  
24  
25 Indigenous theoretical literature supports the assertion that sociocultural resources and cultural  
26  
27 participation is health-promoting.<sup>26-28</sup> AI/AN resilience is dynamic and accessed through familial,  
28  
29 communal, and cultural knowledge and expressions (e.g., traditional activity participation, spiritual  
30  
31 practices, positive identity promotion, social support, feelings of connectedness to family and  
32  
33 nature).<sup>26,28</sup> These deeply rooted beliefs and practices have been identified as multilevel factors that  
34  
35 can buffer poor outcomes, strengthen resilience, and promote health.<sup>29</sup>  
36  
37  
38  
39

40 Preventing ACEs and increasing access to and participation in resilience-building opportunities  
41  
42 could contribute to closing the health equity gap for AI communities. An examination of moderating  
43  
44 and health promoting factors is particularly salient for Tribal communities given complex health  
45  
46 service delivery systems and limited systemic resources for monitoring and addressing behavioral  
47  
48 health on reservations.<sup>21, 30</sup> Despite this great need, few studies have examined AI/AN-specific  
49  
50 protective factors or resilience contributors in the context of ACEs. As an exception, Burnette and  
51  
52 colleagues (2015) found that social support had a protective effect on depressive symptoms among  
53  
54  
55  
56  
57  
58  
59  
60

1  
2  
3 AI/AN older adults who experienced ACEs.<sup>15</sup> In another study, youth who experienced child  
4 maltreatment and other stressors had a reduced likelihood of suicidality if they discussed problems  
5 with friends or family and reported connectedness with family.<sup>30</sup> However, no AI/AN-specific studies  
6 of which we are aware have investigated adult cultural and social protective factors in the face of  
7 earlier life adversities and their potential for moderating the relationship between ACEs and adult self-  
8 rated mental and physical health.  
9  
10  
11  
12  
13  
14  
15

16  
17 The purpose of this study is to 1) determine the frequency of select ACEs within a sample of  
18 AI/AN adults living with T2D, and 2) examine associations between ACEs, social supports, cultural  
19 factors, and self-rated physical and mental health. Three hypotheses guided our inquiry:  
20  
21  
22

23  
24 H1: ACEs will be negatively associated with self-reported physical and mental health status.

25  
26 H2: Social support (general and diabetes-specific) and Indigenous cultural factors will be  
27 positively associated with self-reported physical and mental health status.  
28  
29

30  
31 H3: Social support and cultural factors will buffer (moderate) the effects of ACEs on physical and  
32 mental health.  
33  
34

## 35 **METHODS**

36  
37 The Maawaji' idi-oog Mino-ayaawin (Gathering for Health) project is a community-based  
38 participatory research (CBPR) collaboration between the University of Minnesota and five AI (i.e.,  
39 Ojibwe) communities. The primary purpose of the study was to understand sources of stress and  
40 examine their impact on T2D-related outcomes for AIs. Tribal resolutions supporting the project were  
41 granted by all five tribal nation governments.  
42  
43  
44  
45  
46  
47  
48

### 49 **Patient and Public Involvement**

50  
51 Community Research Councils (CRCs) from each tribe worked closely with the university  
52 research team to develop and implement study protocols, participate in data collection, interpretation,  
53  
54  
55  
56  
57  
58  
59  
60

1  
2  
3 and dissemination. Members of the CRCs included patients living with type 2 diabetes, patient  
4 providers, community members, and elders. As such, patient perspectives were incorporated into the  
5 design and conduct of this study. All CRCs read and/or contributed to this manuscript prior to journal  
6 submission, and the paper was approved for submission by the Indian Health Service (IHS) National  
7 Institutional Review Board. Participants will receive a mailed infographic summarizing major overall  
8 study results. In addition, the research team has/will continue to present findings within each tribal  
9 community via written technical reports and in-person presentations at local health fairs, tribal council  
10 meetings, and public gatherings.  
11  
12  
13  
14  
15  
16  
17  
18  
19  
20

### 21 **Procedure and Sample**

22  
23  
24 Project methodology and human subjects approval was granted by the University of Minnesota  
25 (IRB) and the IHS IRB. The study involved 2 major phases: 1) a qualitative step including two sets of  
26 focus groups to identify salient community stressors and adapt/develop survey measures, and 2) a  
27 quantitative phase including survey data from computer-assisted personal interviews (CAPI; details  
28 below). The goal of this process was to maximize measurement validity for local culture and  
29 contexts. Prior to CAPI field entry, we also piloted any adapted or new measures with a convenience  
30 sample of AI participants and asked for open-ended feedback on question applicability and  
31 comprehension. Feedback from pilot surveys permitted us to further refine measures in collaboration  
32 with CRC members. Data presented in this study are from Phase 2 CAPI responses.  
33  
34  
35  
36  
37  
38  
39  
40  
41  
42  
43

44  
45 Staff at each IHS clinic site generated simple random samples for Phase 2 study recruitment  
46 from patient records. Inclusion criteria were a diagnosis of type 2 diabetes, age 18 years or older, and  
47 self-identified as AI/AN. A total of 194 participants enrolled in the study, representing a baseline  
48 response rate of 67%.  
49  
50  
51  
52  
53  
54  
55  
56  
57  
58  
59  
60

1  
2  
3 Clinic staff sent study letters of invitation and brochures to residences of randomly selected  
4  
5 patients. Non-refusing individuals were contacted and screened for eligibility by trained community  
6  
7 interviewers. Visits were scheduled at a location of participants' choosing, at which time interviewers  
8  
9 gathered signed informed consent and HIPAA authorization forms prior to administering surveys. We  
10  
11 analyzed responses from the 192 participants for which we have baseline CAPI completed from 2013  
12  
13 to 2015. Participants received a \$50 incentive and a small, culturally meaningful gift for their  
14  
15 participation.  
16  
17

## 18 19 **Measures**

20  
21 Three control variables were included in analyses: *age* (in years), *gender* (male = 0, female =  
22  
23 1), and *per capita household income* were each assessed via self-report survey responses. Two  
24  
25 dependent variables, self-rated mental health and self-rated physical health, each ranged in value from  
26  
27 0 (poor) to 4 (excellent); thus, higher scores indicate better health. A continuous ACEs measure was  
28  
29 created by summing affirmative responses to 9 experiences related to household dysfunction,  
30  
31 witnessing violence, and emotional, physical, and sexual abuse while growing up; participants were  
32  
33 included in this continuous measure if they answered at least 5 of the 9 ACE items (n = 182;  
34  
35 Cronbach's alpha = .77).  
36  
37

38  
39 Several protective independent variables were also included. Social support was assessed by 9  
40  
41 items adapted from a previous measure of perceived emotional and instrumental support received from  
42  
43 others.<sup>31</sup> Example items include: *there is at least one person I can share most things with; I have*  
44  
45 *someone to help me if I am physically unwell; I feel that I have a circle of people who value me, and,*  
46  
47 *when I am feeling down, there is someone I can lean on* (Cronbach's alpha = .89) Diabetes-specific  
48  
49 support (adapted from Fitzgerald)<sup>32</sup> includes 5 items and assesses perceived support directly related to  
50  
51 diabetes management including help to *follow a healthy meal plan, handle feelings about diabetes, and*  
52  
53  
54  
55  
56  
57  
58  
59  
60



1  
2  
3 *test (my) blood sugar* (Cronbach's alpha = .86). Traditional spiritual activities include summed 'yes'  
4 responses to 9 spiritually relevant cultural activities, such as seeking advice/guidance from a spiritual  
5 advisor or participating in a sweat lodge, which were engaged in during the prior year (Cronbach's  
6 alpha = .81). We also utilized an adapted Awareness of Connectedness<sup>33</sup> measure that included 6 items  
7 assessing degree of connection to nature, family, and community (e.g., *I feel connected to nature;*  
8 *When I am hurting, my family hurts with me; My community's happiness is a part of my happiness;*  
9 Cronbach's alpha = .74.

### 19 **Statistical Analysis**

21 We used SPSS v. 24 to conduct all analyses with list-wise deletion of missing values, including  
22 Ordinary Least Squares (OLS) regression analyses for multivariate models. There were few missing  
23 cases across variables; full sample responses were given for age, gender, and communal mastery and  
24 missing data for remaining variables ranges from 1 – 4 cases total, with the exception of individual  
25 ACE items (Table 1). We generated a total of eight separate OLS models to examine the associations  
26 between the four protective factors and their potentially moderating effects for each of the two  
27 outcome variables (mental and physical health) after accounting for controls. Tests of moderation  
28 included a multiplicative interaction term for each protective variable x ACE scores.

### 40 **RESULTS**

41 The average age of the study participants was 46.3 years (SD = 12.2), mean per capita  
42 household income was \$9,767.00, and slightly more than half were female (55.7%). Frequencies of  
43 nine ACEs appear in Table 1. An average of 3.05 (SD = 2.46) ACEs were reported by participants and  
44 81.9% (n = 149) reported at least one ACE (not displayed).  
45  
46  
47  
48  
49  
50  
51  
52  
53  
54  
55  
56  
57  
58  
59  
60

**Table 1: Adverse Childhood Experiences among American Indian Adults Living with Type 2 Diabetes**

|                                                                                                                                                           | Never/No | At Least Once/Yes |
|-----------------------------------------------------------------------------------------------------------------------------------------------------------|----------|-------------------|
| When you were growing up, did you live with a household member who was a problem drinker or alcoholic, or misused street or prescription drugs? (n = 181) | 51.9%    | 48.1%             |
| When you were growing up, did you live with a household member who was depressed, mentally ill, or suicidal? (n = 180)                                    | 78.3%    | 21.7%             |
| When you were growing up, did you live with a household member who was ever sent to jail or prison? (n=179)                                               | 68.2%    | 31.8%             |
| When you were growing up, how often did you see or hear a parent or household member in your home being slapped, kicked, punched, or beaten up? (n=180)   | 52.2%    | 47.8%             |
| When you were growing up, how often did a parent, guardian, or other household member yell, scream, swear at you, insult you, or humiliate you? (n = 182) | 51.1%    | 48.9%             |
| When you were growing up, how often did a parent, guardian, or other household member spank you, slap you, kick you, punch you, or beat you up? (n = 179) | 43.6%    | 56.4%             |
| When you were growing up, how often did someone touch or fondle you in a sexual way when you did not want them to? (n = 179)                              | 76.5%    | 23.5%             |
| When you were growing up, how often did someone make you touch their body in a sexual way when you did not want them to? (n = 177)                        | 86.4%    | 13.6%             |
| When you were growing up, how often did someone actually have oral, anal, or vaginal intercourse when you did not want them to? (n = 181)                 | 83.4%    | 16.6%             |

Table 2 displays results of OLS regression analyses. As hypothesized (H1), across all models and controlling for gender, age, and income, ACEs were negatively associated with mental and

1  
2  
3 physical health. Also as hypothesized (H2), involvement in spiritual activities, stronger awareness of  
4  
5 connectedness, social support, and diabetes-specific support were all positively and significantly  
6  
7 associated with self-reported mental and physical health in these models. Two of the control variables  
8  
9 were also related to health in the multivariate analyses. Per capita household income was significantly  
10  
11 and positively associated with mental and physical health across all models, and being female was  
12  
13 associated with worse mental health in one model only.  
14  
15  
16  
17  
18  
19  
20  
21  
22  
23  
24  
25  
26  
27  
28  
29  
30  
31  
32  
33  
34  
35  
36  
37  
38  
39  
40  
41  
42  
43  
44  
45  
46  
47  
48  
49  
50  
51  
52  
53  
54  
55  
56  
57  
58  
59  
60

**Table 2: Results from Ordinary Least Squares Regression Analyses**

|                            | Mental Health    |               | Physical Health  |               | Mental Health    |               | Physical Health  |               | Mental Health    |                         | Physical Health  |                         | Mental Health    |              | Physical Health  |                         |
|----------------------------|------------------|---------------|------------------|---------------|------------------|---------------|------------------|---------------|------------------|-------------------------|------------------|-------------------------|------------------|--------------|------------------|-------------------------|
|                            | N = 176          |               |                  |               | N = 177          |               |                  |               | N = 176          |                         |                  |                         | N = 177          |              |                  |                         |
|                            | B (SE)           | β                       | B (SE)           | β                       | B (SE)           | β            | B (SE)           | β                       |
| Age                        | -.01(.01)        | -.08          | -.00(.01)        | -.03          | -.01(.01)        | -.09          | -.00(.01)        | -.04          | -.01(.01)        | -.06                    | -.00(.01)        | -.02                    | -.01(.01)        | -.07         | -.00(.01)        | -.01                    |
| Gender                     | -.15(.15)        | -.07          | -.02(.13)        | -.01          | -.15(.14)        | -.08          | -.02(.13)        | -.01          | <b>-.23(.14)</b> | <b>-.12<sup>†</sup></b> | -.05(.13)        | -.03                    | -.13(.15)        | -.07         | .05(.13)         | .03                     |
| Per Capita HH Income       | <b>.02(.01)</b>  | <b>.22**</b>  | <b>.02(.01)</b>  | <b>.18*</b>   | <b>.02(.01)</b>  | <b>.20**</b>  | <b>.02(.01)</b>  | <b>.15*</b>   | <b>.02(.01)</b>  | <b>.15*</b>             | <b>.01(.01)</b>  | <b>.14<sup>†</sup></b>  | <b>.02(.01)</b>  | <b>.20**</b> | <b>.01(.01)</b>  | <b>0.15<sup>†</sup></b> |
| ACEs                       | <b>-.09(.03)</b> | <b>-.23**</b> | <b>-.08(.03)</b> | <b>-.22**</b> | <b>-.08(.03)</b> | <b>-.20**</b> | <b>-.07(.03)</b> | <b>-.20**</b> | <b>-.06(.03)</b> | <b>-.16*</b>            | <b>-.06(.03)</b> | <b>-.17*</b>            | <b>-.07(.03)</b> | <b>-.18*</b> | <b>-.06(.03)</b> | <b>-.17*</b>            |
| Spiritual Activities       | <b>.06(.03)</b>  | <b>.15*</b>   | .03(.03)         | .07           |                  |               |                  |               |                  |                         |                  |                         |                  |              |                  |                         |
| Awareness of Connectedness |                  |               |                  |               | <b>.07(.03)</b>  | <b>.18</b>    | <b>.08(.03)</b>  | <b>.23**</b>  |                  |                         |                  |                         |                  |              |                  |                         |
| Social Support             |                  |               |                  |               |                  |               |                  |               | <b>.50(.10)</b>  | <b>.35***</b>           | <b>.27(.10)</b>  | <b>.20**</b>            |                  |              |                  |                         |
| Support x ACEs             |                  |               |                  |               |                  |               |                  |               |                  |                         | <b>-.07(.04)</b> | <b>-.14<sup>†</sup></b> |                  |              |                  |                         |
| Diabetes Specific Support  |                  |               |                  |               |                  |               |                  |               |                  |                         |                  |                         | .03(.02)         | .10          | <b>.06(.02)</b>  | <b>.21**</b>            |
| Diabetes Support x ACEs    |                  |               |                  |               |                  |               |                  |               |                  |                         |                  |                         |                  |              | <b>-.02(.01)</b> | <b>-.15*</b>            |

\*\*\*p </= .001; \*\*p </= .01; \*p </= .05, †p </= .10; two-tailed tests

We included interaction terms for each of the protective factors by ACEs for all independent variables; two of these emerged as statistically significant and are plotted in Figure 1 and Figure 2. As shown and in partial support of the third hypothesis (H3), social support and diabetes-specific support moderated the negative associations between ACEs and physical health. More specifically, physical health ratings were highest (better) for those reporting high support and low ACEs. Even when reporting higher ACEs, those in high support contexts still had better self-reported physical health than those with lower ACE scores but less supportive environments.

INSERT FIGURE 1 and FIGURE 2 HERE

## DISCUSSION

1  
2  
3 This study adds important evidence to the limited research on ACEs and T2D among American  
4 Indians who have a demonstrated higher prevalence of both compared to non-Indigenous US  
5 populations.<sup>7,17</sup> In this multisite community study, cultural and social indicators were linked to better  
6 mental and physical health even when accounting for ACEs. We also found partial evidence for ACE-  
7 buffering effects of social support on health.  
8  
9  
10  
11  
12  
13

14 Approximately 82% of this AI sample reported experiencing at least one ACE. Our finding is  
15 much higher than the less than two-thirds of non-Native adults who report one or more ACEs in the  
16 now classic Kaiser/CDC study.<sup>34</sup> Our percentage of 82% in this Midwest AI sample is consistent with  
17 the 78.1% minimum exposure rate (one or more ACE) reported by adolescent AIs on one northern  
18 plains reservation<sup>7</sup> and the 86% of participants in a seven tribe study.<sup>8</sup>  
19  
20  
21  
22  
23  
24  
25

26 As hypothesized, self-rated physical and mental health were negatively associated with ACEs  
27 for this sample of adults managing T2D, a complex chronic disease. This is not surprising given what  
28 is known from research showing strong associations between ACEs and health outcomes including  
29 T2D itself.<sup>35-37</sup> As many AI/ANs exhibit drastic health disparities, these conclusions are useful to  
30 public health and tribal health systems for consideration in long-term diabetes reduction strategies.  
31 Primary and secondary prevention efforts targeting ACE exposures and intermediate health outcomes  
32 (e.g. behavioral health), respectively, may reduce the prevalence of T2D within Tribal communities.  
33  
34  
35  
36  
37  
38  
39  
40  
41

42 Better physical health was associated with spiritual activity involvement, family, community  
43 and nature connectedness, social support, and diabetes-specific support. We thus advance the literature  
44 by documenting protective associations between Indigenous cultural factors (i.e., involvement in  
45 spiritual activities and connectedness) and health that persist even when accounting for ACE exposures  
46 and demographics. Cultural connectedness, social support, and traditional practices as wellness  
47 promoting factors are widely understood within Tribal communities. Therefore, this research supports  
48  
49  
50  
51  
52  
53  
54  
55  
56  
57  
58  
59  
60

1  
2  
3 Indigenous knowledges and underscores the critical importance of “a community-based prevention  
4 approach [that] recognizes the inherent knowledge of community members and their expertise.”<sup>38</sup>  
5  
6

7 While social support has a well-documented positive impact on patients with diabetes,<sup>39-41</sup> we  
8 add to this literature by demonstrating that adult support appears to moderate the negative effects of  
9 childhood adversities among AIs. That is, our findings suggest that adulthood social support networks  
10 may buffer the harmful impact of ACEs on health. This includes diabetes-specific support for AIs  
11 diagnosed with T2D. Diabetes interventions promoting socially supportive environments may prove  
12 useful for better prognosis.  
13  
14  
15  
16  
17  
18  
19  
20

21 Our findings also revealed a consistent, inverse relationship between per capita household  
22 income and health status. Poverty is a fundamental determinant of health driving health inequities,<sup>42, 43</sup>  
23 and pervasive poverty impacts many reservation communities including those participating in this  
24 study. The protective impact of increasing incomes documented here lends evidence to the importance  
25 of addressing structural issues related to health including unemployment and low-paying jobs.<sup>44,45</sup> In  
26 addition, gender emerged as a significant correlate of mental health in one of the models wherein  
27 women reported worse mental health than men. Although this was not a robust finding in these  
28 analyses, it is consistent with prior research indicating higher levels of internalizing symptoms in  
29 females relative to males.<sup>46</sup>  
30  
31  
32  
33  
34  
35  
36  
37  
38  
39  
40  
41

#### 42 *Limitations and Future Research*

  
43

44 This study has several limitations for consideration. First, retrospective ACE studies may  
45 involve systematic error such as recall bias and false negative findings.<sup>47</sup> Measurement and  
46 methodology differences hamper our ability to draw firm conclusions about the prevalence of AI/AN  
47 ACEs shown here and those documented nationally. ACEs reflected in this study are similar to most  
48 others in that they rely on a set of childhood stressors developed for mostly white, middle-class  
49  
50  
51  
52  
53  
54  
55  
56  
57  
58  
59  
60

1  
2  
3 individuals with health insurance and who lived in Southern California; as such, results should be  
4  
5 interpreted with these specific adversities in mind. A host of additional adversities including culturally-  
6  
7 specific ACEs are beginning to be addressed<sup>7</sup> and deserve additional attention in future research.

8  
9  
10 Given variability in the types and severity of ACEs potentially experienced across cultures and  
11  
12 community context, our estimates may be conservative and underscore even more the importance of  
13  
14 culturally meaningful ACEs and placed-based assessments as a regular part of diabetes care and health  
15  
16 care in general.<sup>7</sup> Future research should include identification of specific forms and types of childhood  
17  
18 stressors as well as the severity and frequency of the exposure that are particularly harmful to Native  
19  
20 people alongside appraisal of socio-cultural contexts that promote healing and wellbeing.  
21  
22

## 23 24 **CONCLUSIONS**

25  
26 Our findings importantly demonstrate how cultural and family supports relate to better health  
27  
28 and in certain cases ameliorate the negative impact of ACEs among T2D patients who face the  
29  
30 complexities of managing chronic disease care. For policy makers, our work suggests that funding  
31  
32 allocations could support community-level resilience building activities and thus move beyond  
33  
34 individual-level behavior change (e.g., diet, exercise). Specifically, programs that enhance social  
35  
36 support and include opportunities for cultural connectedness should be encouraged.  
37  
38

39  
40 For health professionals, this research highlights the importance of life-course histories to  
41  
42 assess childhood experiences and the lingering impact of childhood experiences on adult AI wellbeing.  
43  
44 At the same time, providers including diabetes care professionals should encourage strategies for  
45  
46 promoting help-seeking skills, social belonging, and cultural activity participation for patients,  
47  
48 particularly among those reporting a multitude of childhood adversities. Such support and  
49  
50 encouragement could prove beneficial in promoting physical and mental health. These results also  
51  
52 support the work of program development staff in tribal communities who regularly engage in efforts  
53  
54  
55  
56  
57  
58  
59  
60

1  
2  
3 to incorporate cultural group activities as wellness promotion and prevention mechanisms. These  
4  
5 implications can inform wider health promotion strategies within and outside the health care system.  
6  
7 For example, tribes may want to incorporate research findings into their design of trauma-informed  
8  
9 care strategies and integrated behavioral health care. Finally, these findings have implications for  
10  
11 health promotion across all cultures by highlighting the potential for socio-cultural integration to  
12  
13 improve human wellness.  
14  
15  
16  
17  
18  
19  
20  
21  
22  
23  
24  
25  
26  
27  
28  
29  
30  
31  
32  
33  
34  
35  
36  
37  
38  
39  
40  
41  
42  
43  
44  
45  
46  
47  
48  
49  
50  
51  
52  
53  
54  
55  
56  
57  
58  
59  
60



## References

1. Anda RF, Whitfield CL, Felitti VJ, et al. Adverse childhood experiences, alcoholic parents, and later risk of alcoholism and depression. *Psychiatr Serv.* 2002;53(8):1001-1009. <http://dx.doi.org/10.1176/appi.ps.53.8.1001>.
2. Dube SR, Anda RF, Felitti VJ, Chapman DP, Williamson DF, Giles WH. Childhood abuse, household dysfunction, and the risk of attempted suicide throughout the life span: findings from the Adverse Childhood Experiences Study. *JAMA.* 2001;286(24):3089-3096.
3. Dube SR, Anda RF, Felitti VJ, Edwards VJ, Croft JB. Adverse childhood experiences and personal alcohol abuse as an adult. *Addict Behav.* 2002;27(5):713-725.
4. Dube SR, Anda RF, Felitti VJ, Edwards VJ, Williamson DF. Exposure to abuse, neglect, and household dysfunction among adults who witnessed intimate partner violence as children: implications for health and social services. *Violence Vict.* 2002;17(1):3-17
5. Dube SR, Felitti VJ, Dong M, Chapman DP, Giles WH, Anda RF. Childhood abuse, neglect, and household dysfunction and the risk of illicit drug use: the Adverse Childhood Experiences Study. *Pediatrics.* 2003;111(3):564-572.
6. Felitti VJ, Anda RF, Nordenberg D, et al. Relationship of childhood abuse and household dysfunction to many of the leading causes of death in adults. The Adverse Childhood Experiences (ACE) Study. *Am J Prev Med.* 1998;14(4):245-258.
7. Brockie TN, Dana-Sacco G, Wallen GR, Wilcox HC, Campbell JC. The relationship of adverse childhood experiences to PTSD, depression, poly-drug use and suicide attempt in reservation-based Native American adolescents and young adults. *Am J Community Psychol.* 2015;55(3-4):411-421. <http://doi.org/10.1007/s10464-015-9721-3>.
8. Koss MP, Yuan NP, Dightman D, et al. Adverse childhood exposures and alcohol dependence among seven Native American tribes [published online ahead of print, October 25, 2003]. *Am J Prev Med.* 2003;25(3):238-244. [http://dx.doi.org/10.1016/S0749-3797\(03\)00195-8](http://dx.doi.org/10.1016/S0749-3797(03)00195-8).
9. Felitti VJ. Adverse childhood experiences and adult health [published online ahead of print, April 9, 2009]. *Acad Pediatr.* 2009;9(3):131-132. <http://dx.doi.org/10.1016/j.acap.2009.03.001>.
10. Dong M, Anda RF, Felitti VJ, et al. The interrelatedness of multiple forms of childhood abuse, neglect, and household dysfunction. *Child Abuse Negl.* 2004;28(7):771-784. <http://dx.doi.org/10.1016/j.chiabu.2004.01.008>.
11. Finkelhor, D., Shattuck, A., Turner, H., & Hamby, S. (2015). A revised inventory of Adverse Childhood Experiences. *Child Abuse Negl*, 48, 13-21. doi:10.1016/j.chiabu.2015.07.011
12. Wade, R., Jr., Cronholm, P. F., Fein, J. A., Forke, C. M., Davis, M. B., Harkins-Schwarz, M., . . . Bair-Merritt, M. H. (2016). Household and community-level Adverse Childhood Experiences and adult health outcomes in a diverse urban population. *Child Abuse Negl*, 52, 135-145. doi:10.1016/j.chiabu.2015.11.021
13. Kenney MK, Singh GK. Adverse childhood experiences among American Indian/Alaska Native children: The 2011-2012 National Survey of Children's Health [published online ahead of print, July 26, 2016]. *Scientifica (Cairo).* 2016;2016:7424239. <http://dx.doi.org/10.1155/2016/7424239>.
14. Jiang L, Beals J, Whitesell NR, Roubideaux Y, Manson SM, Team A-S. Stress burden and diabetes in two American Indian reservation communities. [published online ahead of print, December 10, 2007]. *Diabetes Care.* 2008;31(3):427-429. <http://dx.doi.org/10.2337/dc07-2044>.
15. Burnette CE, Roh S, Lee KH, Lee YS, Newland LA, Jun JS. A comparison of risk and protective factors related to depressive symptoms among American Indian and Caucasian older adults

- [published online ahead of print, February 1, 2017]. *Health Soc Work*. 2017;42(1):e15-e23. <http://dx.doi.org/10.1093/hsw/hlw055>.
16. Roh S, Burnette CE, Lee KH, Lee YS, Easton SD, Lawler MJ. Risk and protective factors for depressive symptoms among American Indian older adults: adverse childhood experiences and social support [published online ahead of print, July 29, 2014]. *Aging Ment Health*. 2015;19(4):371-380. <http://dx.doi.org/10.1080/13607863.2014.938603>.
  17. Center for Disease Control and Prevention. National Diabetes Statistics Report. <https://www.cdc.gov/diabetes/pdfs/data/statistics/national-diabetes-statistics-report.pdf>. Published 2017.
  18. West KM. Diabetes in American Indians and other native populations of the New World. *Diabetes*. 1974;23(10):841-855.
  19. Cheong EV, Sinnott C, Dahly D, Kearney PM. Adverse childhood experiences (ACEs) and later-life depression: perceived social support as a potential protective factor [published online ahead of print, September 1, 2017]. *BMJ Open*. 2017;7(9):e013228. <http://dx.doi.org/10.1136/bmjopen-2016-013228>.
  20. Center on the Developing Child. The Science of Resilience (In Brief). <https://developingchild.harvard.edu/resources/inbrief-the-science-of-resilience>. Published 2015.
  21. Pollard JA, Hawkins JD, Arthur MW. Risk and protection: are both necessary to understand diverse behavioral outcomes in adolescence? *Soc Work Res*. 1999;23(3):145-158.
  22. Allen J, Hopper K, Wexler L, Kral M, Rasmus S, Nystad K. Mapping resilience pathways of Indigenous youth in five circumpolar communities [published online ahead of print, August 21, 2013]. *Transcult Psychiatry*. 2014;51(5):601-631. <http://dx.doi.org/10.1177/1363461513497232>.
  23. Khanlou N, Wray R. A whole community approach toward child and youth resilience promotion: a review of resilience literature [published online ahead of print, January 15, 2014]. *Int J Ment Health Addict*. 2014;12(1):64-79. <http://dx.doi.org/10.1007/s11469-013-9470-1>.
  24. Southwick SM, Bonanno GA, Masten AS, Panter-Brick C, Yehuda R. Resilience definitions, theory, and challenges: interdisciplinary perspectives [published online ahead of print, October 1, 2014]. *Eur J Psychotraumatol*. 2014;5(1). <http://dx.doi.org/10.3402/ejpt.v5.25338>.
  25. Nurius PS, Logan-Greene P, Green S. Adverse childhood experiences (ACE) within a social disadvantage framework: distinguishing unique, cumulative, and moderated contributions to adult mental health [published online ahead of print, September 12, 2012]. *J Prev Interv Community*. 2012;40(4):278-290 <http://dx.doi.org/10.1080/10852352.2012.707443>.
  26. Elm JH, Lewis JP, Walters KL, Self JM. "I'm in this world for a reason": resilience and recovery among American Indian and Alaska Native two-spirit women [published online ahead of print, June 2, 2016]. *J Lesbian Stud*. 2016;20(3-4):352-371. <http://dx.doi.org/10.1080/10894160.2016.1152813>.
  27. Alacántara C, Joseph P. Reviewing suicide in Native American communities: situating risk and protective factors within a transactional-ecological framework. *Death Stud*. 2007;31:457-477.
  28. Walters KL, Simoni JM. Reconceptualizing native women's health: an "indigenist" stress-coping model. *Am J Public Health*. 2002;92(4):520-524.
  29. Henson M, Sabo S, Trujillo A, Teufel-Shone N. Identifying protective factors to promote health in American Indian and Alaska Native adolescents: a literature review. *J Prim Prev*. 2017;38(1-2):5-26. <http://dx.doi.org/10.1007/s10935-016-0455-2>.

- 1  
2  
3 30. Borowsky I, Resnick MD, Ireland M, Blum R. Suicide attempts among American Indian and  
4 Alaska Native youth: risk and protective factors. *Arch Pediatr Adolesc Med.* 1999;153(6):573-  
5 580.  
6  
7 31. Shakespeare-Finch J, Obst PL. The development of the 2-Way Social Support Scale: a measure of  
8 giving and receiving emotional and instrumental support [published online ahead of print,  
9 August 22, 2011]. *J Pers Assess.* 2011;93(5):483-490.  
10 <http://dx.doi.org/10.1080/00223891.2011.594124>.  
11  
12 32. Fitzgerald JT, Davis WK, Connell CM, Hess GE, Funnell MM, Hiss RG. Development and  
13 validation of the Diabetes Care Profile. *Eval Health Prof.* 1996;19(2):208-230.  
14 <http://dx.doi.org/10.1177/016327879601900205>.  
15  
16 33. Mohatt NV, Fok CC, Burket R, Henry D, Allen J. Assessment of awareness of connectedness as a  
17 culturally-based protective factor for Alaska native youth. *Cultur Divers Ethnic Minor Psychol.*  
18 2011;17(4):444-455. <http://dx.doi.org/10.1037/a0025456>.  
19  
20 34. Centers for Disease Control and Prevention. Behavioral Risk Factor Surveillance System Survey  
21 ACE Module Data, 2010. from <https://www.cdc.gov/violenceprevention/acestudy>. Published  
22 2015.  
23  
24 35. Huang H, Yan P, Shan Z, et al. Adverse childhood experiences and risk of type 2 diabetes: a  
25 systematic review and meta-analysis. *Metabolism.* 2015;64(11):1408-1418.  
26 <http://dx.doi.org/10.1016/j.metabol.2015.08.019>.  
27  
28 36. Nurius PS, Fleming CM, Brindle E. Life Course Pathways From Adverse Childhood Experiences  
29 to Adult Physical Health: A Structural Equation Model. *J Aging Health.*  
30 2017;89826431772644. doi:10.1177/0898264317726448.  
31  
32 37. Chapman DP, Whitfield CL, Felitti VJ, Dube SR, Edwards VJ, Anda RF. Adverse childhood  
33 experiences and the risk of depressive disorders in adulthood [published online ahead of print,  
34 October 15, 2004]. *J Affect Disord.* 2004;82(2):217-225.  
35 <http://dx.doi.org/10.1016/j.jad.2003.12.013>.  
36  
37 38. Israel BA, Coombe CM, Cheezum RR, et al. Community-based participatory research: a capacity-  
38 building approach for policy advocacy aimed at eliminating health disparities. *Am J Public*  
39 *Health.* 2010;100(11):2094-2102. <http://dx.doi.org/10.2105/Ajph.2009.170506>.  
40  
41 39. Gomes LC, Coelho ACM, Gomides DDS, Foss-Freitas MC, Foss MC, Pace AE. Contribution of  
42 family social support to the metabolic control of people with diabetes mellitus: a randomized  
43 controlled clinical trial. *Appl Nurs Res.* 2017;36:68-76.  
44 <http://dx.doi.org/10.1016/j.apnr.2017.05.009>.  
45  
46 40. Laursen KR, Hulman A, Witte DR, Terkildsen Maindal H. Social relations, depressive symptoms,  
47 and incident type 2 diabetes mellitus: the English Longitudinal Study of Ageing. *Diabetes Res*  
48 *Clin Pract.* 2017;126:86-94. <http://dx.doi.org/10.1016/j.diabres.2017.01.006>.  
49  
50 41. Dill EJ, Manson SM, Jiang L, et al. Psychosocial predictors of weight loss among American Indian  
51 and Alaska Native participants in a diabetes prevention translational project. *J Diabetes Res.*  
52 2016;2016:1546939. <http://dx.doi.org/10.1155/2016/1546939>.  
53  
54 42. Marmot, M. (2005). Social determinants of health inequalities. *Lancet*, 365(9464), 1099-1104.  
55 doi:10.1016/s0140-6736(05)71146-6  
56  
57 43. Marmot, M. G., Smith, G. D., Stansfeld, S., Patel, C., North, F., Head, J., . . . Feeney, A. (1991).  
58 Health inequalities among British civil servants: the Whitehall II study. *Lancet*, 337(8754),  
59 1387-1393.  
60  
61 44. Schofield, D. J., Callander, E. J., Shrestha, R. N., Percival, R., Kelly, S. J., & Passey, M. E. (2013).  
62 The association between labour force participation and being in income poverty amongst those

- with mental health problems. *Aging Ment Health*, 17(2), 250-257.  
doi:10.1080/13607863.2012.727381
45. Link, B. G., & Phelan, J. (1995). Social conditions as fundamental causes of disease. *J Health Soc Behav, Spec No*, 80-94.
- 46 Kessler, R. C., Berglund, P., Demler, O., Jin, R., Koretz, D., Merikangas, K. R., ... & Wang, P. S. (2003). The epidemiology of major depressive disorder: results from the National Comorbidity Survey Replication (NCS-R). *JAMA*, 289(23), 3095-3105.
47. Hardt, J, Rutter, M. Validity of adult retrospective reports of adverse childhood experiences: review of the evidence. *J Child Psychol Psychiatry*. 2004;45(2):260-273.

### Acknowledgements:

The authors gratefully acknowledge the clinical and community-based members of the Gathering for Health Team, including Community Research Council members and interviewers: Sidnee Kellar, Rose Barber, Robert Miller, Tweed Shuman, Lorraine Smith, Sandy Zeznanski, Patty Subera, Tracy Martin, Geraldine Whiteman, Lisa Perry, Trisha Prentice, Alexis Mason, Charity Prentice-Pemberton, Kathy Dudley, Romona Nelson, Eileen Miller, Geraldine Brun, Murphy Thomas, Mary Sikora-Petersen, Tina Handeland, GayeAnn Allen, Frances Whitfield, Phillip Chapman, Sr., Sonya Psuik, Hope Williams, Betty Jo Graveen, Daniel Chapman, Jr., Doris Isham, Stan Day, Jane Villebrun, Beverly Steel, Muriel Deegan, Peggy Connor, Michael Connor, Ray E. Villebrun, Sr., Pam Hughes, Cindy McDougall, Melanie McMichael, Robert Thompson, and Sandra Kier.

This study was funded by the National Institute of Diabetes and Digestive and Kidney Diseases of the National Institutes of Health under Award Number DK091250 (M. Walls, PI). The contents of this manuscript are attributable to the authors and do not necessarily represent the viewpoints of the NIH.

We also acknowledge Jacquelyn Campbell, PhD, RN, FAAN for her invaluable expertise and comments during the preparation of this manuscript.

No financial disclosures were reported by any of the authors of this paper.

**Data Sharing Statement:** No additional data sharing available.

### Figure Legends:

— — **Low Social Support**                      — — **Low Diabetes Support**

— **High Social Support**                      — **High Diabetes Support**

1  
2  
3  
4  
5  
6  
7  
8  
9  
10  
11  
12  
13  
14  
15  
16  
17  
18  
19  
20  
21  
22  
23  
24  
25  
26  
27  
28  
29  
30  
31  
32  
33  
34  
35  
36  
37  
38  
39  
40  
41  
42  
43  
44  
45  
46  
47  
48  
49  
50  
51  
52  
53  
54  
55  
56  
57  
58  
59  
60

**Figure 1: Self-Rated Physical Health by ACE Exposure and Social Support**

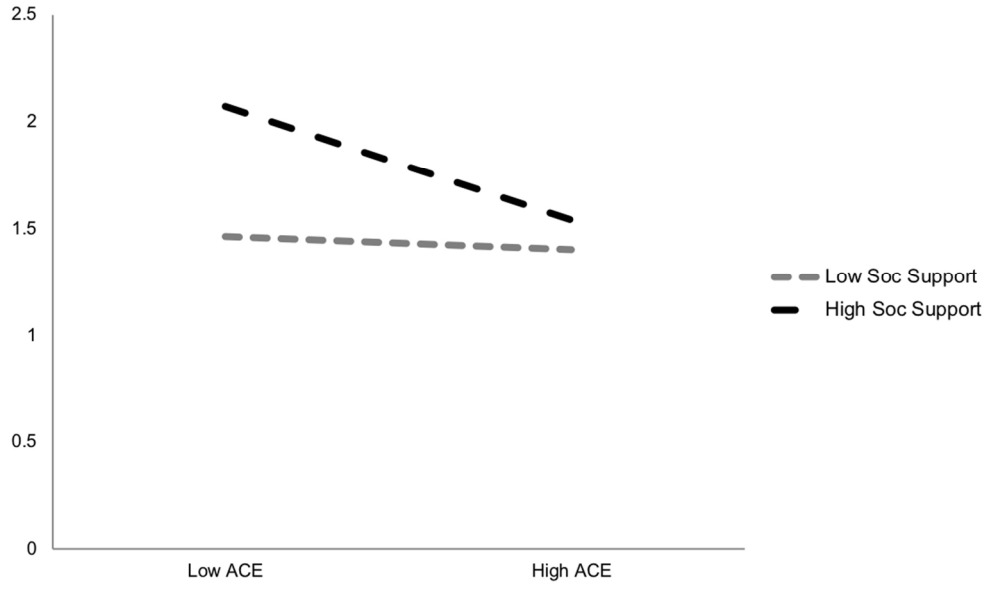

Figure 1

194x123mm (300 x 300 DPI)

view only

1  
2  
3  
4  
5  
6  
7  
8  
9  
10  
11  
12  
13  
14  
15  
16  
17  
18  
19  
20  
21  
22  
23  
24  
25  
26  
27  
28  
29  
30  
31  
32  
33  
34  
35  
36  
37  
38  
39  
40  
41  
42  
43  
44  
45  
46  
47  
48  
49  
50  
51  
52  
53  
54  
55  
56  
57  
58  
59  
60

**Figure 2: Self-Rated Physical Health by ACE Exposure and Diabetes-Specific Support**

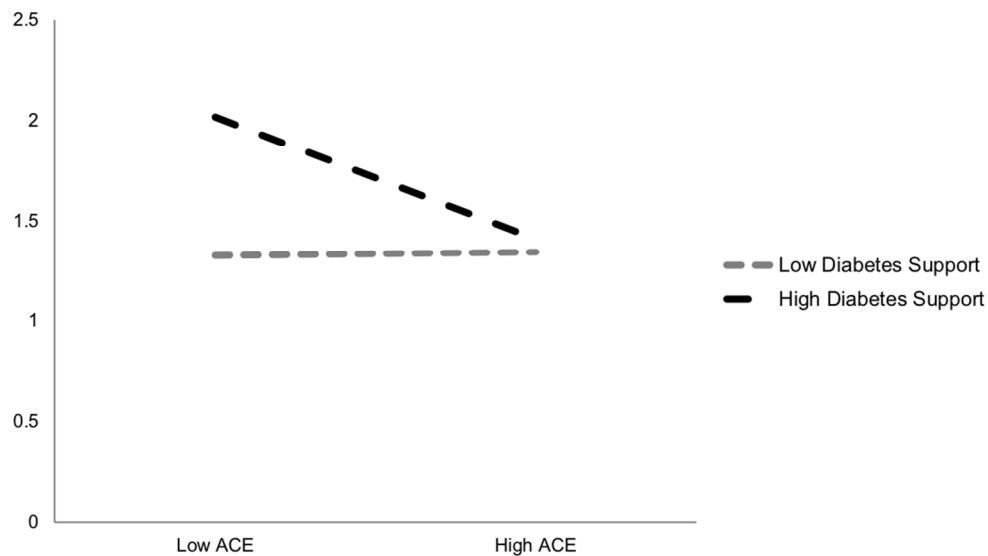

Figure 2

189x119mm (300 x 300 DPI)

Review only

## STROBE Statement—checklist of items that should be included in reports of observational studies

|                              | Item No | Recommendation                                                                                                                                                                                                                                                                                                                                                                                                                                                                                                                                                                                                                                                                                            |
|------------------------------|---------|-----------------------------------------------------------------------------------------------------------------------------------------------------------------------------------------------------------------------------------------------------------------------------------------------------------------------------------------------------------------------------------------------------------------------------------------------------------------------------------------------------------------------------------------------------------------------------------------------------------------------------------------------------------------------------------------------------------|
| <b>Title and abstract</b>    | 1       | (a) Indicate the study's design with a commonly used term in the title or the abstract. X Page 1<br>(b) Provide in the abstract an informative and balanced summary of what was done and what was found X Page 2                                                                                                                                                                                                                                                                                                                                                                                                                                                                                          |
| <b>Introduction</b>          |         |                                                                                                                                                                                                                                                                                                                                                                                                                                                                                                                                                                                                                                                                                                           |
| Background/rationale         | 2       | Explain the scientific background and rationale for the investigation being reported X Pages 4-6                                                                                                                                                                                                                                                                                                                                                                                                                                                                                                                                                                                                          |
| Objectives                   | 3       | State specific objectives, including any prespecified hypotheses Page 6                                                                                                                                                                                                                                                                                                                                                                                                                                                                                                                                                                                                                                   |
| <b>Methods</b>               |         |                                                                                                                                                                                                                                                                                                                                                                                                                                                                                                                                                                                                                                                                                                           |
| Study design                 | 4       | Present key elements of study design early in the paper X Page 2 & 6-8                                                                                                                                                                                                                                                                                                                                                                                                                                                                                                                                                                                                                                    |
| Setting                      | 5       | Describe the setting, locations, and relevant dates, including periods of recruitment, exposure, follow-up, and data collection X Pages 6 -8                                                                                                                                                                                                                                                                                                                                                                                                                                                                                                                                                              |
| Participants                 | 6       | (a) <i>Cohort study</i> —Give the eligibility criteria, and the sources and methods of selection of participants. Describe methods of follow-up<br><i>Case-control study</i> —Give the eligibility criteria, and the sources and methods of case ascertainment and control selection. Give the rationale for the choice of cases and controls<br><i>Cross-sectional study</i> —Give the eligibility criteria, and the sources and methods of selection of participants X Page 7<br>(b) <i>Cohort study</i> —For matched studies, give matching criteria and number of exposed and unexposed<br><i>Case-control study</i> —For matched studies, give matching criteria and the number of controls per case |
| Variables                    | 7       | Clearly define all outcomes, exposures, predictors, potential confounders, and effect modifiers. Give diagnostic criteria, if applicable X Pages 7 -8                                                                                                                                                                                                                                                                                                                                                                                                                                                                                                                                                     |
| Data sources/<br>measurement | 8*      | For each variable of interest, give sources of data and details of methods of assessment (measurement). Describe comparability of assessment methods if there is more than one group X Pages 7 -8                                                                                                                                                                                                                                                                                                                                                                                                                                                                                                         |
| Bias                         | 9       | Describe any efforts to address potential sources of bias see Page 12                                                                                                                                                                                                                                                                                                                                                                                                                                                                                                                                                                                                                                     |
| Study size                   | 10      | Explain how the study size was arrived at X Page 7                                                                                                                                                                                                                                                                                                                                                                                                                                                                                                                                                                                                                                                        |
| Quantitative variables       | 11      | Explain how quantitative variables were handled in the analyses. If applicable, describe which groupings were chosen and why X Page 8                                                                                                                                                                                                                                                                                                                                                                                                                                                                                                                                                                     |
| Statistical methods          | 12      | (a) Describe all statistical methods, including those used to control for confounding X Page 8<br>(b) Describe any methods used to examine subgroups and interactions X Pgs 8-10<br>(c) Explain how missing data were addressed X Page 7<br>(d) <i>Cohort study</i> —If applicable, explain how loss to follow-up was addressed<br><i>Case-control study</i> —If applicable, explain how matching of cases and controls was addressed<br><i>Cross-sectional study</i> —If applicable, describe analytical methods taking account of sampling strategy X Page 6-8<br>(e) Describe any sensitivity analyses N/A                                                                                             |

Continued on next page

**Results**

|                  |     |                                                                                                                                                                                                                                                                                                                                                                                                                                 |
|------------------|-----|---------------------------------------------------------------------------------------------------------------------------------------------------------------------------------------------------------------------------------------------------------------------------------------------------------------------------------------------------------------------------------------------------------------------------------|
| Participants     | 13* | (a) Report numbers of individuals at each stage of study—eg numbers potentially eligible, examined for eligibility, confirmed eligible, included in the study, completing follow-up, and analysed X Page 7<br>(b) Give reasons for non-participation at each stage N/A<br>(c) Consider use of a flow diagram N/A                                                                                                                |
| Descriptive data | 14* | (a) Give characteristics of study participants (eg demographic, clinical, social) and information on exposures and potential confounders X Page 8<br>(b) Indicate number of participants with missing data for each variable of interest X Page 8-9<br>(c) <i>Cohort study</i> —Summarise follow-up time (eg, average and total amount)                                                                                         |
| Outcome data     | 15* | <i>Cohort study</i> —Report numbers of outcome events or summary measures over time<br><i>Case-control study</i> —Report numbers in each exposure category, or summary measures of exposure<br><i>Cross-sectional study</i> —Report numbers of outcome events or summary measures X Page 9                                                                                                                                      |
| Main results     | 16  | (a) Give unadjusted estimates and, if applicable, confounder-adjusted estimates and their precision (eg, 95% confidence interval). Make clear which confounders were adjusted for and why they were included X page 10<br>(b) Report category boundaries when continuous variables were categorized N/A<br>(c) If relevant, consider translating estimates of relative risk into absolute risk for a meaningful time period N/A |
| Other analyses   | 17  | Report other analyses done—eg analyses of subgroups and interactions, and sensitivity analyses X Page 10                                                                                                                                                                                                                                                                                                                        |

**Discussion**

|                  |    |                                                                                                                                                                                         |
|------------------|----|-----------------------------------------------------------------------------------------------------------------------------------------------------------------------------------------|
| Key results      | 18 | Summarise key results with reference to study objectives X Pages 9-12                                                                                                                   |
| Limitations      | 19 | Discuss limitations of the study, taking into account sources of potential bias or imprecision. Discuss both direction and magnitude of any potential bias X Page 12                    |
| Interpretation   | 20 | Give a cautious overall interpretation of results considering objectives, limitations, multiplicity of analyses, results from similar studies, and other relevant evidence X Page 12-13 |
| Generalisability | 21 | Discuss the generalisability (external validity) of the study results X Page 12                                                                                                         |

**Other information**

|         |    |                                                                                                                                                                         |
|---------|----|-------------------------------------------------------------------------------------------------------------------------------------------------------------------------|
| Funding | 22 | Give the source of funding and the role of the funders for the present study and, if applicable, for the original study on which the present article is based X Page 17 |
|---------|----|-------------------------------------------------------------------------------------------------------------------------------------------------------------------------|



# BMJ Open

## Examining Protective and Buffering Associations Between Socio-Cultural Factors and Adverse Childhood Experiences among American Indian Adults with Type 2 Diabetes: A Quantitative, Community-Based Participatory Research Approach

|                                 |                                                                                                                                                                                         |
|---------------------------------|-----------------------------------------------------------------------------------------------------------------------------------------------------------------------------------------|
| Journal:                        | <i>BMJ Open</i>                                                                                                                                                                         |
| Manuscript ID                   | bmjopen-2018-022265.R2                                                                                                                                                                  |
| Article Type:                   | Research                                                                                                                                                                                |
| Date Submitted by the Author:   | 27-Jul-2018                                                                                                                                                                             |
| Complete List of Authors:       | Brockie, Teresa; Johns Hopkins University, Community Public Health Nursing<br>Elm, Jessica; University of Washington, School of Social Work<br>Walls, Melissa; University of Minnesota, |
| <b>Primary Subject Heading</b>: | Public health                                                                                                                                                                           |
| Secondary Subject Heading:      | Diabetes and endocrinology, General practice / Family practice, Patient-centred medicine, Public health, Sociology                                                                      |
| Keywords:                       | Adverse Childhood Experiences, ACEs, American Indians, Type 2 Diabetes, Culture                                                                                                         |
|                                 |                                                                                                                                                                                         |

SCHOLARONE™  
Manuscripts

only

1  
2  
3 **Examining Protective and Buffering Associations Between Socio-Cultural Factors and Adverse**  
4 **Childhood Experiences among American Indian Adults with Type 2 Diabetes: A Quantitative,**  
5 **Community-Based Participatory Research Approach**  
6  
7

8 Teresa N. Brockie, PhD, RN, FAAN  
9 Assistant Professor  
10 Community Public Health Nursing  
11 Johns Hopkins School of Nursing  
12 525 N. Wolfe Street Room 440  
13 Baltimore, MD 21205  
14 [tbrocki1@jhu.edu](mailto:tbrocki1@jhu.edu)  
15

16  
17 Jessica H. L. Elm, MSW  
18 University of Washington  
19 School of Social Work  
20 Seattle, WA  
21 [jelm@uw.edu](mailto:jelm@uw.edu)  
22  
23

24 **Corresponding Author:** Melissa L. Walls, PhD  
25 Associate Professor  
26 Department of Biobehavioral Health & Population Sciences  
27 University of Minnesota Medical School, Duluth campus  
28 1035 University Drive  
29 235 Smed  
30 Duluth, MN 55812  
31 218-726-8367  
32 [mlwalls@d.umn.edu](mailto:mlwalls@d.umn.edu)  
33  
34

35 **Word count:** 3274  
36

37 **Conflict of interest:**

38 The authors report no conflicts of interest.

39 **Funding Statement:**

40 This study was funded by the National Institute of Diabetes and Digestive and Kidney Diseases of the  
41 National Institutes of Health under Award Number DK091250 (M. Walls, PI). The contents of this  
42 manuscript are attributable to the authors and do not necessarily represent the viewpoints of the NIH.  
43

44 **Financial disclosure:**

45 No financial disclosures were reported by any of the authors of this paper.

46 **Author Statement of Contributions:**

47 T.B. was responsible for drafting the literature review, discussion and conclusions sections. J.E. edited  
48 and added substantive content to the manuscript. M.W. performed data analyses and drafted methods  
49 and results sections and oversaw data collection. All authors reviewed the final version of the  
50 manuscript.  
51

52 **Key Words:** Adverse Childhood Experiences, ACEs, American Indians, Type 2 Diabetes, Culture  
53  
54  
55  
56  
57  
58  
59

## Abstract

### Objectives:

The purpose of this study was to determine the frequency of select Adverse Childhood Experiences (ACEs) among a sample of American Indian adults living with type 2 diabetes and the associations between ACEs on health. We also examined protective associations between socio-cultural factors and physical and mental health, including possible buffering processes.

### Design:

Survey data for this observational study was collected using computer assisted survey interviewing techniques between 2013 – 2015.

### Setting:

Participants were randomly selected from American Indian tribal clinic facilities on five reservations in the upper Midwestern United States.

### Participants:

Inclusion criteria were a diagnosis of type 2 diabetes, age 18 years or older, and self-identified as AI. The sample includes N=192 adults (55.7% female; mean age = 46.3 years).

### Primary Measures:

We assessed nine ACEs related to household dysfunction, violence, and emotional, physical, or sexual abuse. Independent variables included social support, diabetes support, and two cultural factors: spiritual activities and connectedness. Primary outcomes were self-rated physical and mental health.

### Results:

An average of 3.05 ACEs were reported by participants and 81.9% (n = 149) said they had experienced at least one ACE. Controlling for gender, age, and income, ACEs were negatively associated with self-rated mental and physical health ( $p < .05$ ). Involvement in spiritual activities, social support, and diabetes support were all positively, significantly associated with mental and physical health. Social support variables moderated associations between ACEs and physical health.

### Conclusions:

This research demonstrates inverse associations between ACEs and adult AI diabetes patient wellbeing. The findings further demonstrate the promise of social and cultural integration as a critical component of wellness, a point of relevance for all cultures. Health professionals can use findings from this study to augment their assessment of patients and guide them to health-promoting social support services and resources for cultural involvement.

## ARTICLE SUMMARY

### Strengths and Limitations of this Study:

- This is the first quantitative observational study of which we are aware to examine American Indian adult cultural and social protective factors in the face of earlier life adversities and their potential moderating relationship between Adverse Childhood Experiences (ACEs) and adult self-rated mental and physical health.
- Study scope and methodology was developed using community-based participatory research principles to promote authentic researcher/community member collaboration.
- We contribute to a limited body of literature on ACEs and American Indian health by assessing ACE exposure and correlates for a clinical sample of Native adults.
- We rely on retrospective reports of ACEs that may involve systematic error including recall bias that should be considered when interpreting findings.

## INTRODUCTION

Adverse childhood experiences (ACEs) are early life stressful situations or traumatic events that often co-occur, and potent determinants of health linked to increased morbidity and mortality across the life course.<sup>1-9</sup> The foundational Centers for Disease Control and Prevention (CDC) Kaiser Permanente ACEs retrospective adult studies (Kaiser/CDC studies) identified a set of eight to ten childhood stressors including childhood emotional, physical, and sexual abuse, emotional and physical neglect, witnessing intimate partner violence, parental separation, and living with a substance abusing, mentally ill, or criminal household member.<sup>5,6</sup> These childhood stressors have been shown to correspond with later life outcomes, such as Type 2 Diabetes (T2D), substance abuse, and suicide attempts, with graded, positive relationships between the number of ACE exposures and risk for health outcomes.<sup>5,6,10</sup> Adaptations of the Kaiser/CDC measures across settings have expanded ACE criteria to include, for example, peer isolation and rejection,<sup>11</sup> peer victimization,<sup>12</sup> and community level indicators like community violence<sup>12</sup> and poverty.<sup>13</sup> In the absence of protective factors, existing evidence suggests that early trauma and toxic stress can have lasting effects on physical and mental health.<sup>3,5,6,11</sup>

The emerging literature on ACEs among the American Indian/Alaska Native (AI/AN) population has identified disproportionately high rates of ACEs and childhood stressors that are associated with multiple health outcomes including suicidality,<sup>7</sup> substance misuse,<sup>8</sup> diabetes,<sup>14</sup> and worse mental health including depressive symptoms.<sup>15-16</sup> There is also movement to identify ACEs appropriate for AI/AN culture and context, such as historical loss associated symptoms and discrimination<sup>7</sup>. Elevated and unique experiences with ACEs offer explanation for the pronounced health inequities experienced by AI/AN communities, including heightened rates of T2D. For example, data from 2013-2015 indicated adult overall prevalence of T2D for AI/ANs was 15.1%, versus 7.4%

1  
2  
3 for non-Hispanic whites.<sup>17</sup> Further, T2D represents a modern epidemic among AI/ANs, especially  
4  
5 considering that prior to the 1940's the diagnosis was relatively uncommon for this demographic.<sup>18</sup>  
6  
7

8 In the wake of such compelling evidence that ACEs can lead to serious health consequences,  
9  
10 researchers have begun identifying factors that may provide a protective effect against ACE impacts.<sup>19</sup>  
11  
12 One way in which protective factors operate is through the fostering, building, and exertion of  
13  
14 resilience as an ability to overcome significant life stressors.<sup>20-24</sup> In a US sample, factors such as sense  
15  
16 of community have been shown to have direct and indirect protective effects on ACEs, including  
17  
18 moderating roles for the impact of ACEs on adult mental health.<sup>25</sup>  
19  
20

21 Resilience promotion is not a new concept within Tribal communities. AI/ANs have  
22  
23 longstanding traditional knowledges that include instructions on how to stay well and thrive, and  
24  
25 Indigenous theoretical literature supports the assertion that sociocultural resources and cultural  
26  
27 participation is health-promoting.<sup>26-28</sup> AI/AN resilience is dynamic and accessed through familial,  
28  
29 communal, and cultural knowledge and expressions (e.g., traditional activity participation, spiritual  
30  
31 practices, positive identity promotion, social support, feelings of connectedness to family and  
32  
33 nature).<sup>26,28</sup> These deeply rooted beliefs and practices have been identified as multilevel factors that  
34  
35 can buffer poor outcomes, strengthen resilience, and promote health.<sup>29</sup>  
36  
37  
38  
39

40 Preventing ACEs and increasing access to and participation in resilience-building opportunities  
41  
42 could contribute to closing the health equity gap for AI communities. An examination of moderating  
43  
44 and health promoting factors is particularly salient for Tribal communities given complex health  
45  
46 service delivery systems and limited systemic resources for monitoring and addressing behavioral  
47  
48 health on reservations.<sup>21, 30</sup> Despite this great need, few studies have examined AI/AN-specific  
49  
50 protective factors or resilience contributors in the context of ACEs. As an exception, Burnette and  
51  
52 colleagues (2015) found that social support had a protective effect on depressive symptoms among  
53  
54  
55  
56  
57  
58  
59  
60

1  
2  
3 AI/AN older adults who experienced ACEs.<sup>15</sup> In another study, youth who experienced child  
4 maltreatment and other stressors had a reduced likelihood of suicidality if they discussed problems  
5 with friends or family and reported connectedness with family.<sup>30</sup> However, no AI/AN-specific studies  
6 of which we are aware have investigated adult cultural and social protective factors in the face of  
7 earlier life adversities and their potential for moderating the relationship between ACEs and adult self-  
8 rated mental and physical health.  
9  
10  
11  
12  
13  
14  
15

16  
17 The purpose of this study is to 1) determine the frequency of select ACEs within a sample of  
18 AI/AN adults living with T2D, and 2) examine associations between ACEs, social supports, cultural  
19 factors, and self-rated physical and mental health. Three hypotheses guided our inquiry:  
20  
21  
22

23  
24 H1: ACEs will be negatively associated with self-reported physical and mental health status.

25  
26 H2: Social support (general and diabetes-specific) and Indigenous cultural factors will be  
27 positively associated with self-reported physical and mental health status.  
28  
29

30  
31 H3: Social support and cultural factors will buffer (moderate) the associations between ACEs and  
32 physical and mental health.  
33  
34

## 35 **METHODS**

36  
37 The Maawaji' idi-oog Mino-ayaawin (Gathering for Health) project is a community-based  
38 participatory research (CBPR) collaboration between the University of Minnesota and five AI (i.e.,  
39 Ojibwe) communities. The primary purpose of the study was to understand sources of stress and  
40 examine their impact on T2D-related outcomes for AIs. Tribal resolutions supporting the project were  
41 granted by all five tribal nation governments.  
42  
43  
44  
45  
46  
47  
48

### 49 **Patient and Public Involvement**

50  
51 Community Research Councils (CRCs) from each tribe worked closely with the university  
52 research team to develop and implement study protocols, participate in data collection, interpretation,  
53  
54  
55  
56  
57  
58  
59  
60

1  
2  
3 and dissemination. Members of the CRCs included patients living with type 2 diabetes, patient  
4 providers, community members, and elders. As such, patient perspectives were incorporated into the  
5 design and conduct of this study. All CRCs read and/or contributed to this manuscript prior to journal  
6 submission, and the paper was approved for submission by the Indian Health Service (IHS) National  
7 Institutional Review Board. Participants will receive a mailed infographic summarizing major overall  
8 study results. In addition, the research team has/will continue to present findings within each tribal  
9 community via written technical reports and in-person presentations at local health fairs, tribal council  
10 meetings, and public gatherings.  
11  
12  
13  
14  
15  
16  
17  
18  
19  
20

### 21 **Procedure and Sample**

22  
23  
24 Project methodology and human subjects approval was granted by the University of Minnesota  
25 (IRB) and the IHS IRB. The study involved 2 major phases: 1) a qualitative step including two sets of  
26 focus groups to identify salient community stressors and adapt/develop survey measures, and 2) a  
27 quantitative phase including survey data from computer-assisted personal interviews (CAPI; details  
28 below). The goal of this process was to maximize measurement validity for local culture and  
29 contexts. Prior to CAPI field entry, we also piloted any adapted or new measures with a convenience  
30 sample of AI participants and asked for open-ended feedback on question applicability and  
31 comprehension. Feedback from pilot surveys permitted us to further refine measures in collaboration  
32 with CRC members. Data presented in this study are from Phase 2 CAPI responses.  
33  
34  
35  
36  
37  
38  
39  
40  
41  
42  
43

44  
45 Staff at each IHS clinic site generated simple random samples for Phase 2 study recruitment  
46 from patient records. Inclusion criteria were a diagnosis of type 2 diabetes, age 18 years or older, and  
47 self-identified as AI/AN. A total of 194 participants enrolled in the study, representing a baseline  
48 response rate of 67%.  
49  
50  
51  
52  
53  
54  
55  
56  
57  
58  
59  
60



1  
2  
3 Clinic staff sent study letters of invitation and brochures to residences of randomly selected  
4  
5 patients. Non-refusing individuals were contacted and screened for eligibility by trained community  
6  
7 interviewers. Visits were scheduled at a location of participants' choosing, at which time interviewers  
8  
9 gathered signed informed consent and HIPAA authorization forms prior to administering surveys. We  
10  
11 analyzed responses from the 192 participants for which we have baseline CAPI completed from 2013  
12  
13 to 2015. Participants received a \$50 incentive and a small, culturally meaningful gift for their  
14  
15 participation.  
16  
17

### 18 19 **Measures**

20  
21 Three control variables were included in analyses: *age* (in years), *gender* (male = 0, female =  
22  
23 1), and *per capita household income* were each assessed via self-report survey responses. Two  
24  
25 dependent variables, self-rated mental health and self-rated physical health, each ranged in value from  
26  
27 0 (poor) to 4 (excellent); thus, higher scores indicate better health. A continuous ACEs measure was  
28  
29 created by summing affirmative responses to 9 experiences related to household dysfunction,  
30  
31 witnessing violence, and emotional, physical, and sexual abuse while growing up; participants were  
32  
33 included in this continuous measure if they answered at least 5 of the 9 ACE items (n = 182;  
34  
35 Cronbach's alpha = .77).  
36  
37

38  
39 Several protective independent variables were also included. Social support was assessed by 9  
40  
41 items adapted from a previous measure of perceived emotional and instrumental support received from  
42  
43 others.<sup>31</sup> Example items include: *there is at least one person I can share most things with; I have*  
44  
45 *someone to help me if I am physically unwell; I feel that I have a circle of people who value me, and,*  
46  
47 *when I am feeling down, there is someone I can lean on* (Cronbach's alpha = .89) Diabetes-specific  
48  
49 support (adapted from Fitzgerald)<sup>32</sup> includes 5 items and assesses perceived support directly related to  
50  
51 diabetes management including help to *follow a healthy meal plan, handle feelings about diabetes, and*  
52  
53  
54  
55  
56  
57  
58  
59  
60

1  
2  
3 *test (my) blood sugar* (Cronbach's alpha = .86). Traditional spiritual activities include summed 'yes'  
4 responses to 9 spiritually relevant cultural activities, such as seeking advice/guidance from a spiritual  
5 advisor or participating in a sweat lodge, which were engaged in during the prior year (Cronbach's  
6 alpha = .81). We also utilized an adapted Awareness of Connectedness<sup>33</sup> measure that included 6 items  
7 assessing degree of connection to nature, family, and community (e.g., *I feel connected to nature;*  
8 *When I am hurting, my family hurts with me; My community's happiness is a part of my happiness;*  
9 Cronbach's alpha = .74. A full listing of survey measures included in this manuscript is provided as a  
10 supplementary file.  
11  
12  
13  
14  
15  
16  
17  
18  
19  
20

## 21 **Statistical Analysis**

22  
23 We used SPSS v. 24 to conduct all analyses with list-wise deletion of missing values, including  
24 Ordinary Least Squares (OLS) regression analyses for multivariate models. There were few missing  
25 cases across variables; full sample responses were given for age, gender, and communal mastery and  
26 missing data for remaining variables ranges from 1 – 4 cases total, with the exception of individual  
27 ACE items (Table 1). We generated a total of eight separate OLS models to examine the associations  
28 between the four protective factors and their potentially moderating relationships for each of the two  
29 outcome variables (mental and physical health) after accounting for controls. Tests of moderation  
30 included a multiplicative interaction term for each protective variable x ACE scores.  
31  
32  
33  
34  
35  
36  
37  
38  
39  
40  
41

## 42 **RESULTS**

43  
44 The average age of the study participants was 46.3 years (SD = 12.2), mean per capita  
45 household income was \$9,767.00, and slightly more than half were female (55.7%). Frequencies of  
46 nine ACEs appear in Table 1. An average of 3.05 (SD = 2.46) ACEs were reported by participants and  
47 81.9% (n = 149) reported at least one ACE (not displayed).  
48  
49  
50  
51  
52  
53  
54  
55  
56  
57  
58  
59  
60

**Table 1: Adverse Childhood Experiences among American Indian Adults Living with Type 2 Diabetes**

|                                                                                                                                                           | Never/No | At Least Once/Yes |
|-----------------------------------------------------------------------------------------------------------------------------------------------------------|----------|-------------------|
| When you were growing up, did you live with a household member who was a problem drinker or alcoholic, or misused street or prescription drugs? (n = 181) | 51.9%    | 48.1%             |
| When you were growing up, did you live with a household member who was depressed, mentally ill, or suicidal? (n = 180)                                    | 78.3%    | 21.7%             |
| When you were growing up, did you live with a household member who was ever sent to jail or prison? (n=179)                                               | 68.2%    | 31.8%             |
| When you were growing up, how often did you see or hear a parent or household member in your home being slapped, kicked, punched, or beaten up? (n=180)   | 52.2%    | 47.8%             |
| When you were growing up, how often did a parent, guardian, or other household member yell, scream, swear at you, insult you, or humiliate you? (n = 182) | 51.1%    | 48.9%             |
| When you were growing up, how often did a parent, guardian, or other household member spank you, slap you, kick you, punch you, or beat you up? (n = 179) | 43.6%    | 56.4%             |
| When you were growing up, how often did someone touch or fondle you in a sexual way when you did not want them to? (n = 179)                              | 76.5%    | 23.5%             |
| When you were growing up, how often did someone make you touch their body in a sexual way when you did not want them to? (n = 177)                        | 86.4%    | 13.6%             |
| When you were growing up, how often did someone actually have oral, anal, or vaginal intercourse when you did not want them to? (n = 181)                 | 83.4%    | 16.6%             |

Table 2 displays results of OLS regression analyses. As hypothesized (H1), across all models and controlling for gender, age, and income, ACEs were negatively associated with mental and physical health. Also as hypothesized (H2), involvement in spiritual activities, stronger awareness of connectedness, social support, and diabetes-specific support were all positively and significantly associated with self-reported mental and physical health in these models. Two of the control variables were also related to health in the multivariate analyses. Per capita household income was significantly and positively associated with mental and physical health across all models, and being female was associated with worse mental health in one model only.

Table 2: Results from Ordinary Least Squares Regression Analyses

|                            | Mental Health    |               | Physical Health  |               | Mental Health    |               | Physical Health  |               | Mental Health    |                         | Physical Health  |                         | Mental Health    |              | Physical Health  |                         |
|----------------------------|------------------|---------------|------------------|---------------|------------------|---------------|------------------|---------------|------------------|-------------------------|------------------|-------------------------|------------------|--------------|------------------|-------------------------|
|                            | N = 176          |               |                  |               | N = 177          |               |                  |               | N = 176          |                         |                  |                         | N = 177          |              |                  |                         |
|                            | B (SE)           | β                       | B (SE)           | β                       | B (SE)           | β            | B (SE)           | β                       |
| Age                        | -.01(.01)        | -.08          | -.00(.01)        | -.03          | -.01(.01)        | -.09          | -.00(.01)        | -.04          | -.01(.01)        | -.06                    | -.00(.01)        | -.02                    | -.01(.01)        | -.07         | -.00(.01)        | -.01                    |
| Gender                     | -.15(.15)        | -.07          | -.02(.13)        | -.01          | -.15(.14)        | -.08          | -.02(.13)        | -.01          | <b>-.23(.14)</b> | <b>-.12<sup>†</sup></b> | -.05(.13)        | -.03                    | -.13(.15)        | -.07         | .05(.13)         | .03                     |
| Per Capita HH Income       | <b>.02(.01)</b>  | <b>.22**</b>  | <b>.02(.01)</b>  | <b>.18*</b>   | <b>.02(.01)</b>  | <b>.20**</b>  | <b>.02(.01)</b>  | <b>.15*</b>   | <b>.02(.01)</b>  | <b>.15*</b>             | <b>.01(.01)</b>  | <b>.14<sup>†</sup></b>  | <b>.02(.01)</b>  | <b>.20**</b> | <b>.01(.01)</b>  | <b>0.15<sup>†</sup></b> |
| ACEs                       | <b>-.09(.03)</b> | <b>-.23**</b> | <b>-.08(.03)</b> | <b>-.22**</b> | <b>-.08(.03)</b> | <b>-.20**</b> | <b>-.07(.03)</b> | <b>-.20**</b> | <b>-.06(.03)</b> | <b>-.16*</b>            | <b>-.06(.03)</b> | <b>-.17*</b>            | <b>-.07(.03)</b> | <b>-.18*</b> | <b>-.06(.03)</b> | <b>-.17*</b>            |
| Spiritual Activities       | <b>.06(.03)</b>  | <b>.15*</b>   | .03(.03)         | .07           |                  |               |                  |               |                  |                         |                  |                         |                  |              |                  |                         |
| Awareness of Connectedness |                  |               |                  |               | <b>.07(.03)</b>  | <b>.18</b>    | <b>.08(.03)</b>  | <b>.23**</b>  |                  |                         |                  |                         |                  |              |                  |                         |
| Social Support             |                  |               |                  |               |                  |               |                  |               | <b>.50(.10)</b>  | <b>.35***</b>           | <b>.27(.10)</b>  | <b>.20**</b>            |                  |              |                  |                         |
| Support x ACEs             |                  |               |                  |               |                  |               |                  |               |                  |                         | <b>-.07(.04)</b> | <b>-.14<sup>†</sup></b> |                  |              |                  |                         |
| Diabetes Specific Support  |                  |               |                  |               |                  |               |                  |               |                  |                         |                  |                         | .03(.02)         | .10          | <b>.06(.02)</b>  | <b>.21**</b>            |
| Diabetes Support x ACEs    |                  |               |                  |               |                  |               |                  |               |                  |                         |                  |                         |                  |              | <b>-.02(.01)</b> | <b>-.15*</b>            |

\*\*\*p <= .001; \*\*p <= .01; \*p <= .05, †p <= .10; two-tailed tests

We included interaction terms for each of the protective factors by ACEs for all independent variables; two of these emerged as statistically significant and are plotted in Figure 1 and Figure 2. As shown and in partial support of the third hypothesis (H3), social support and diabetes-specific support moderated the negative associations between ACEs and physical health. More specifically, physical health ratings were highest (better) for those reporting high support and low ACEs. Even when reporting higher ACEs, those in high support contexts still had better self-reported physical health than those with lower ACE scores but less supportive environments.

INSERT FIGURE 1 and FIGURE 2 HERE

### DISCUSSION

1  
2  
3 This study adds important evidence to the limited research on ACEs and T2D among American  
4 Indians who have a demonstrated higher prevalence of both compared to non-Indigenous US  
5 populations.<sup>7,17</sup> In this multisite community study, cultural and social indicators were linked to better  
6 mental and physical health even when accounting for ACEs. We also found partial evidence for the  
7 moderating role of social support on associations between ACEs and health.  
8  
9  
10  
11  
12  
13

14  
15 Approximately 82% of this AI sample reported experiencing at least one ACE. Our finding is  
16 much higher than the less than two-thirds of non-Native adults who report one or more ACEs in the  
17 now classic Kaiser/CDC study.<sup>34</sup> Our percentage of 82% in this Midwest AI sample is consistent with  
18 the 78.1% minimum exposure rate (one or more ACE) reported by adolescent AIs on one northern  
19 plains reservation<sup>7</sup> and the 86% of participants in a seven tribe study.<sup>8</sup>  
20  
21  
22  
23  
24  
25

26 As hypothesized, self-rated physical and mental health were negatively associated with ACEs  
27 for this sample of adults managing T2D, a complex chronic disease. This is not surprising given what  
28 is known from research showing strong associations between ACEs and health outcomes including  
29 T2D itself.<sup>35-37</sup> As many AI/ANs exhibit drastic health disparities, these conclusions are useful to  
30 public health and tribal health systems for consideration in long-term diabetes reduction strategies.  
31 Primary and secondary prevention efforts targeting ACE exposures and intermediate health outcomes  
32 (e.g. behavioral health), respectively, may reduce the prevalence of T2D within Tribal communities.  
33  
34  
35  
36  
37  
38  
39  
40  
41

42 Better physical health was associated with spiritual activity involvement, family, community  
43 and nature connectedness, social support, and diabetes-specific support. We thus advance the literature  
44 by documenting protective associations between Indigenous cultural factors (i.e., involvement in  
45 spiritual activities and connectedness) and health that persist even when accounting for ACE exposures  
46 and demographics. Cultural connectedness, social support, and traditional practices as wellness  
47 promoting factors are widely understood within Tribal communities. Therefore, this research supports  
48  
49  
50  
51  
52  
53  
54  
55  
56  
57  
58  
59  
60

1  
2  
3 Indigenous knowledges and underscores the critical importance of “a community-based prevention  
4 approach [that] recognizes the inherent knowledge of community members and their expertise.”<sup>38</sup>  
5  
6

7 While social support has a well-documented positive impact on patients with diabetes,<sup>39-41</sup> we  
8 add to this literature by demonstrating that adult support appears to moderate the harms of childhood  
9 adversities among AIs. That is, our findings suggest that adulthood social support networks may buffer  
10 the negative relationships between ACEs and health. This includes diabetes-specific support for AIs  
11 diagnosed with T2D. Diabetes interventions promoting socially supportive environments may prove  
12 useful for better prognosis.  
13  
14  
15  
16  
17  
18  
19  
20

21 Our findings also revealed a consistent, inverse relationship between per capita household  
22 income and health status. Poverty is a fundamental determinant of health driving health inequities,<sup>42, 43</sup>  
23 and pervasive poverty impacts many reservation communities including those participating in this  
24 study. The protective impact of increasing incomes documented here lends evidence to the importance  
25 of addressing structural issues related to health including unemployment and low-paying jobs.<sup>44,45</sup> In  
26 addition, gender emerged as a significant correlate of mental health in one of the models wherein  
27 women reported worse mental health than men. Although this was not a robust finding in these  
28 analyses, it is consistent with prior research indicating higher levels of internalizing symptoms in  
29 females relative to males.<sup>46</sup>  
30  
31  
32  
33  
34  
35  
36  
37  
38  
39  
40  
41

#### 42 *Limitations and Future Research*

  
43

44 This study has several limitations for consideration. First, retrospective ACE studies may  
45 involve systematic error such as recall bias and false negative findings.<sup>47</sup> Measurement and  
46 methodology differences hamper our ability to draw firm conclusions about the prevalence of AI/AN  
47 ACEs shown here and those documented nationally. ACEs reflected in this study are similar to most  
48 others in that they rely on a set of childhood stressors developed for mostly white, middle-class  
49  
50  
51  
52  
53  
54  
55  
56  
57  
58  
59  
60

1  
2  
3 individuals with health insurance and who lived in Southern California; as such, results should be  
4  
5 interpreted with these specific adversities in mind. A host of additional adversities including culturally-  
6  
7 specific ACEs are beginning to be addressed<sup>7</sup> and deserve additional attention in future research.

8  
9  
10 Given variability in the types and severity of ACEs potentially experienced across cultures and  
11  
12 community context, our estimates may be conservative and underscore even more the importance of  
13  
14 culturally meaningful ACEs and placed-based assessments as a regular part of diabetes care and health  
15  
16 care in general.<sup>7</sup> Future research should include identification of specific forms and types of childhood  
17  
18 stressors as well as the severity and frequency of the exposure that are particularly harmful to Native  
19  
20 people alongside appraisal of socio-cultural contexts that promote healing and wellbeing.  
21  
22

## 23 24 **CONCLUSIONS**

25  
26 Our findings demonstrate how cultural and family supports relate to better health and in certain  
27  
28 cases ameliorate the harms of ACEs among T2D patients who face the complexities of managing  
29  
30 chronic disease care. For policy makers, our work suggests that funding allocations could support  
31  
32 community-level resilience building activities and thus move beyond individual-level behavior change  
33  
34 (e.g., diet, exercise). Specifically, programs that enhance social support and include opportunities for  
35  
36 cultural connectedness should be encouraged.  
37  
38

39  
40 For health professionals, this research highlights the importance of life-course histories to  
41  
42 assess childhood experiences and the lingering impact of childhood experiences on adult AI wellbeing.  
43  
44 At the same time, providers including diabetes care professionals should encourage strategies for  
45  
46 promoting help-seeking skills, social belonging, and cultural activity participation for patients,  
47  
48 particularly among those reporting a multitude of childhood adversities. Such support and  
49  
50 encouragement could prove beneficial in promoting physical and mental health. These results also  
51  
52 support the work of program development staff in tribal communities who regularly engage in efforts  
53  
54  
55  
56  
57  
58  
59  
60

1  
2  
3 to incorporate cultural group activities as wellness promotion and prevention mechanisms. These  
4  
5 implications can inform wider health promotion strategies within and outside the health care system.  
6  
7 For example, tribes may want to incorporate research findings into their design of trauma-informed  
8  
9 care strategies and integrated behavioral health care. Finally, these findings have implications for  
10  
11 health promotion across all cultures by highlighting the potential for socio-cultural integration to  
12  
13 improve human wellness.  
14  
15  
16  
17  
18  
19  
20  
21  
22  
23  
24  
25  
26  
27  
28  
29  
30  
31  
32  
33  
34  
35  
36  
37  
38  
39  
40  
41  
42  
43  
44  
45  
46  
47  
48  
49  
50  
51  
52  
53  
54  
55  
56  
57  
58  
59  
60



## References

1. Anda RF, Whitfield CL, Felitti VJ, et al. Adverse childhood experiences, alcoholic parents, and later risk of alcoholism and depression. *Psychiatr Serv*. 2002;53(8):1001-1009. <http://dx.doi.org/10.1176/appi.ps.53.8.1001>.
2. Dube SR, Anda RF, Felitti VJ, Chapman DP, Williamson DF, Giles WH. Childhood abuse, household dysfunction, and the risk of attempted suicide throughout the life span: findings from the Adverse Childhood Experiences Study. *JAMA*. 2001;286(24):3089-3096.
3. Dube SR, Anda RF, Felitti VJ, Edwards VJ, Croft JB. Adverse childhood experiences and personal alcohol abuse as an adult. *Addict Behav*. 2002;27(5):713-725.
4. Dube SR, Anda RF, Felitti VJ, Edwards VJ, Williamson DF. Exposure to abuse, neglect, and household dysfunction among adults who witnessed intimate partner violence as children: implications for health and social services. *Violence Vict*. 2002;17(1):3-17
5. Dube SR, Felitti VJ, Dong M, Chapman DP, Giles WH, Anda RF. Childhood abuse, neglect, and household dysfunction and the risk of illicit drug use: the Adverse Childhood Experiences Study. *Pediatrics*. 2003;111(3):564-572.
6. Felitti VJ, Anda RF, Nordenberg D, et al. Relationship of childhood abuse and household dysfunction to many of the leading causes of death in adults. The Adverse Childhood Experiences (ACE) Study. *Am J Prev Med*. 1998;14(4):245-258.
7. Brockie TN, Dana-Sacco G, Wallen GR, Wilcox HC, Campbell JC. The relationship of adverse childhood experiences to PTSD, depression, poly-drug use and suicide attempt in reservation-based Native American adolescents and young adults. *Am J Community Psychol*. 2015;55(3-4):411-421. <http://doi.org/10.1007/s10464-015-9721-3>.
8. Koss MP, Yuan NP, Dightman D, et al. Adverse childhood exposures and alcohol dependence among seven Native American tribes [published online ahead of print, October 25, 2003]. *Am J Prev Med*. 2003;25(3):238-244. [http://dx.doi.org/10.1016/S0749-3797\(03\)00195-8](http://dx.doi.org/10.1016/S0749-3797(03)00195-8).
9. Felitti VJ. Adverse childhood experiences and adult health [published online ahead of print, April 9, 2009]. *Acad Pediatr*. 2009;9(3):131-132. <http://dx.doi.org/10.1016/j.acap.2009.03.001>.
10. Dong M, Anda RF, Felitti VJ, et al. The interrelatedness of multiple forms of childhood abuse, neglect, and household dysfunction. *Child Abuse Negl*. 2004;28(7):771-784. <http://dx.doi.org/10.1016/j.chiabu.2004.01.008>.
11. Finkelhor, D., Shattuck, A., Turner, H., & Hamby, S. (2015). A revised inventory of Adverse Childhood Experiences. *Child Abuse Negl*, 48, 13-21. doi:10.1016/j.chiabu.2015.07.011
12. Wade, R., Jr., Cronholm, P. F., Fein, J. A., Forke, C. M., Davis, M. B., Harkins-Schwarz, M., . . . Bair-Merritt, M. H. (2016). Household and community-level Adverse Childhood Experiences and adult health outcomes in a diverse urban population. *Child Abuse Negl*, 52, 135-145. doi:10.1016/j.chiabu.2015.11.021
13. Kenney MK, Singh GK. Adverse childhood experiences among American Indian/Alaska Native children: The 2011-2012 National Survey of Children's Health [published online ahead of print, July 26, 2016]. *Scientifica (Cairo)*. 2016;2016:7424239. <http://dx.doi.org/10.1155/2016/7424239>.
14. Jiang L, Beals J, Whitesell NR, Roubideaux Y, Manson SM, Team A-S. Stress burden and diabetes in two American Indian reservation communities. [published online ahead of print, December 10, 2007]. *Diabetes Care*. 2008;31(3):427-429. <http://dx.doi.org/10.2337/dc07-2044>.
15. Burnette CE, Roh S, Lee KH, Lee YS, Newland LA, Jun JS. A comparison of risk and protective factors related to depressive symptoms among American Indian and Caucasian older adults

- [published online ahead of print, February 1, 2017]. *Health Soc Work*. 2017;42(1):e15-e23. <http://dx.doi.org/10.1093/hsw/hlw055>.
16. Roh S, Burnette CE, Lee KH, Lee YS, Easton SD, Lawler MJ. Risk and protective factors for depressive symptoms among American Indian older adults: adverse childhood experiences and social support [published online ahead of print, July 29, 2014]. *Aging Ment Health*. 2015;19(4):371-380. <http://dx.doi.org/10.1080/13607863.2014.938603>.
  17. Center for Disease Control and Prevention. National Diabetes Statistics Report. <https://www.cdc.gov/diabetes/pdfs/data/statistics/national-diabetes-statistics-report.pdf>. Published 2017.
  18. West KM. Diabetes in American Indians and other native populations of the New World. *Diabetes*. 1974;23(10):841-855.
  19. Cheong EV, Sinnott C, Dahly D, Kearney PM. Adverse childhood experiences (ACEs) and later-life depression: perceived social support as a potential protective factor [published online ahead of print, September 1, 2017]. *BMJ Open*. 2017;7(9):e013228. <http://dx.doi.org/10.1136/bmjopen-2016-013228>.
  20. Center on the Developing Child. The Science of Resilience (In Brief). <https://developingchild.harvard.edu/resources/inbrief-the-science-of-resilience>. Published 2015.
  21. Pollard JA, Hawkins JD, Arthur MW. Risk and protection: are both necessary to understand diverse behavioral outcomes in adolescence? *Soc Work Res*. 1999;23(3):145-158.
  22. Allen J, Hopper K, Wexler L, Kral M, Rasmus S, Nystad K. Mapping resilience pathways of Indigenous youth in five circumpolar communities [published online ahead of print, August 21, 2013]. *Transcult Psychiatry*. 2014;51(5):601-631. <http://dx.doi.org/10.1177/1363461513497232>.
  23. Khanlou N, Wray R. A whole community approach toward child and youth resilience promotion: a review of resilience literature [published online ahead of print, January 15, 2014]. *Int J Ment Health Addict*. 2014;12(1):64-79. <http://dx.doi.org/10.1007/s11469-013-9470-1>.
  24. Southwick SM, Bonanno GA, Masten AS, Panter-Brick C, Yehuda R. Resilience definitions, theory, and challenges: interdisciplinary perspectives [published online ahead of print, October 1, 2014]. *Eur J Psychotraumatol*. 2014;5(1). <http://dx.doi.org/10.3402/ejpt.v5.25338>.
  25. Nurius PS, Logan-Greene P, Green S. Adverse childhood experiences (ACE) within a social disadvantage framework: distinguishing unique, cumulative, and moderated contributions to adult mental health [published online ahead of print, September 12, 2012]. *J Prev Interv Community*. 2012;40(4):278-290 <http://dx.doi.org/10.1080/10852352.2012.707443>.
  26. Elm JH, Lewis JP, Walters KL, Self JM. "I'm in this world for a reason": resilience and recovery among American Indian and Alaska Native two-spirit women [published online ahead of print, June 2, 2016]. *J Lesbian Stud*. 2016;20(3-4):352-371. <http://dx.doi.org/10.1080/10894160.2016.1152813>.
  27. Alacántara C, Joseph P. Reviewing suicide in Native American communities: situating risk and protective factors within a transactional-ecological framework. *Death Stud*. 2007;31:457-477.
  28. Walters KL, Simoni JM. Reconceptualizing native women's health: an "indigenist" stress-coping model. *Am J Public Health*. 2002;92(4):520-524.
  29. Henson M, Sabo S, Trujillo A, Teufel-Shone N. Identifying protective factors to promote health in American Indian and Alaska Native adolescents: a literature review. *J Prim Prev*. 2017;38(1-2):5-26. <http://dx.doi.org/10.1007/s10935-016-0455-2>.

- 1  
2  
3  
4  
5  
6  
7  
8  
9  
10  
11  
12  
13  
14  
15  
16  
17  
18  
19  
20  
21  
22  
23  
24  
25  
26  
27  
28  
29  
30  
31  
32  
33  
34  
35  
36  
37  
38  
39  
40  
41  
42  
43  
44  
45  
46  
47  
48  
49  
50  
51  
52  
53  
54  
55  
56  
57  
58  
59  
60
30. Borowsky I, Resnick MD, Ireland M, Blum R. Suicide attempts among American Indian and Alaska Native youth: risk and protective factors. *Arch Pediatr Adolesc Med.* 1999;153(6):573-580.
  31. Shakespeare-Finch J, Obst PL. The development of the 2-Way Social Support Scale: a measure of giving and receiving emotional and instrumental support [published online ahead of print, August 22, 2011]. *J Pers Assess.* 2011;93(5):483-490.  
<http://dx.doi.org/10.1080/00223891.2011.594124>.
  32. Fitzgerald JT, Davis WK, Connell CM, Hess GE, Funnell MM, Hiss RG. Development and validation of the Diabetes Care Profile. *Eval Health Prof.* 1996;19(2):208-230.  
<http://dx.doi.org/10.1177/016327879601900205>.
  33. Mohatt NV, Fok CC, Burket R, Henry D, Allen J. Assessment of awareness of connectedness as a culturally-based protective factor for Alaska native youth. *Cultur Divers Ethnic Minor Psychol.* 2011;17(4):444-455. <http://dx.doi.org/10.1037/a0025456>.
  34. Centers for Disease Control and Prevention. Behavioral Risk Factor Surveillance System Survey ACE Module Data, 2010. from <https://www.cdc.gov/violenceprevention/acestudy>. Published 2015.
  35. Huang H, Yan P, Shan Z, et al. Adverse childhood experiences and risk of type 2 diabetes: a systematic review and meta-analysis. *Metabolism.* 2015;64(11):1408-1418.  
<http://dx.doi.org/10.1016/j.metabol.2015.08.019>.
  36. Nurius PS, Fleming CM, Brindle E. Life Course Pathways From Adverse Childhood Experiences to Adult Physical Health: A Structural Equation Model. *J Aging Health.* 2017;89826431772644. doi:10.1177/0898264317726448.
  37. Chapman DP, Whitfield CL, Felitti VJ, Dube SR, Edwards VJ, Anda RF. Adverse childhood experiences and the risk of depressive disorders in adulthood [published online ahead of print, October 15, 2004]. *J Affect Disord.* 2004;82(2):217-225.  
<http://dx.doi.org/10.1016/j.jad.2003.12.013>.
  38. Israel BA, Coombe CM, Cheezum RR, et al. Community-based participatory research: a capacity-building approach for policy advocacy aimed at eliminating health disparities. *Am J Public Health.* 2010;100(11):2094-2102. <http://dx.doi.org/10.2105/Ajph.2009.170506>.
  39. Gomes LC, Coelho ACM, Gomides DDS, Foss-Freitas MC, Foss MC, Pace AE. Contribution of family social support to the metabolic control of people with diabetes mellitus: a randomized controlled clinical trial. *Appl Nurs Res.* 2017;36:68-76.  
<http://dx.doi.org/10.1016/j.apnr.2017.05.009>.
  40. Laursen KR, Hulman A, Witte DR, Terkildsen Maindal H. Social relations, depressive symptoms, and incident type 2 diabetes mellitus: the English Longitudinal Study of Ageing. *Diabetes Res Clin Pract.* 2017;126:86-94. <http://dx.doi.org/10.1016/j.diabres.2017.01.006>.
  41. Dill EJ, Manson SM, Jiang L, et al. Psychosocial predictors of weight loss among American Indian and Alaska Native participants in a diabetes prevention translational project. *J Diabetes Res.* 2016;2016:1546939. <http://dx.doi.org/10.1155/2016/1546939>.
  42. Marmot, M. (2005). Social determinants of health inequalities. *Lancet*, 365(9464), 1099-1104. doi:10.1016/s0140-6736(05)71146-6
  43. Marmot, M. G., Smith, G. D., Stansfeld, S., Patel, C., North, F., Head, J., . . . Feeney, A. (1991). Health inequalities among British civil servants: the Whitehall II study. *Lancet*, 337(8754), 1387-1393.
  44. Schofield, D. J., Callander, E. J., Shrestha, R. N., Percival, R., Kelly, S. J., & Passey, M. E. (2013). The association between labour force participation and being in income poverty amongst those

- 1  
2  
3 with mental health problems. *Aging Ment Health*, 17(2), 250-257.  
4 doi:10.1080/13607863.2012.727381  
5  
6 45. Link, B. G., & Phelan, J. (1995). Social conditions as fundamental causes of disease. *J Health Soc*  
7 *Behav, Spec No*, 80-94.  
8 46 Kessler, R. C., Berglund, P., Demler, O., Jin, R., Koretz, D., Merikangas, K. R., ... & Wang, P. S.  
9 (2003). The epidemiology of major depressive disorder: results from the National Comorbidity  
10 Survey Replication (NCS-R). *JAMA*, 289(23), 3095-3105.  
11 47. Hardt, J, Rutter, M. Validity of adult retrospective reports of adverse childhood experiences:  
12 review of the evidence. *J Child Psychol Psychiatry*. 2004;45(2):260-273.  
13  
14  
15  
16  
17  
18  
19  
20  
21  
22  
23  
24  
25  
26  
27  
28  
29  
30  
31  
32  
33  
34  
35  
36  
37  
38  
39  
40  
41  
42  
43  
44  
45  
46  
47  
48  
49  
50  
51  
52  
53  
54  
55  
56  
57  
58  
59  
60

## Acknowledgements:

The authors gratefully acknowledge the clinical and community-based members of the Gathering for Health Team, including Community Research Council members and interviewers: Sidnee Kellar, Rose Barber, Robert Miller, Tweed Shuman, Lorraine Smith, Sandy Zeznanski, Patty Subera, Tracy Martin, Geraldine Whiteman, Lisa Perry, Trisha Prentice, Alexis Mason, Charity Prentice-Pemberton, Kathy Dudley, Romona Nelson, Eileen Miller, Geraldine Brun, Murphy Thomas, Mary Sikora-Petersen, Tina Handeland, GayeAnn Allen, Frances Whitfield, Phillip Chapman, Sr., Sonya Psuik, Hope Williams, Betty Jo Graveen, Daniel Chapman, Jr., Doris Isham, Stan Day, Jane Villebrun, Beverly Steel, Muriel Deegan, Peggy Connor, Michael Connor, Ray E. Villebrun, Sr., Pam Hughes, Cindy McDougall, Melanie McMichael, Robert Thompson, and Sandra Kier.

This study was funded by the National Institute of Diabetes and Digestive and Kidney Diseases of the National Institutes of Health under Award Number DK091250 (M. Walls, PI). The contents of this manuscript are attributable to the authors and do not necessarily represent the viewpoints of the NIH.

We also acknowledge Jacquelyn Campbell, PhD, RN, FAAN for her invaluable expertise and comments during the preparation of this manuscript.

No financial disclosures were reported by any of the authors of this paper.

**Data Sharing Statement:** No additional data sharing available.

## Figure Legend:

**Figure 1:** — — Low Social Support  
— High Social Support

**Figure 2:** — — Low Diabetes Support  
— High Diabetes Support

1  
2  
3  
4  
5  
6  
7  
8  
9  
10  
11  
12  
13  
14  
15  
16  
17  
18  
19  
20  
21  
22  
23  
24  
25  
26  
27  
28  
29  
30  
31  
32  
33  
34  
35  
36  
37  
38  
39  
40  
41  
42  
43  
44  
45  
46  
47  
48  
49  
50  
51  
52  
53  
54  
55  
56  
57  
58  
59  
60

Figure 1: Self-Rated Physical Health by ACE Exposure and Social Support



Figure 1

194x123mm (300 x 300 DPI)

view only

1  
2  
3  
4  
5  
6  
7  
8  
9  
10  
11  
12  
13  
14  
15  
16  
17  
18  
19  
20  
21  
22  
23  
24  
25  
26  
27  
28  
29  
30  
31  
32  
33  
34  
35  
36  
37  
38  
39  
40  
41  
42  
43  
44  
45  
46  
47  
48  
49  
50  
51  
52  
53  
54  
55  
56  
57  
58  
59  
60

**Figure 2: Self-Rated Physical Health by ACE Exposure and Diabetes-Specific Support**

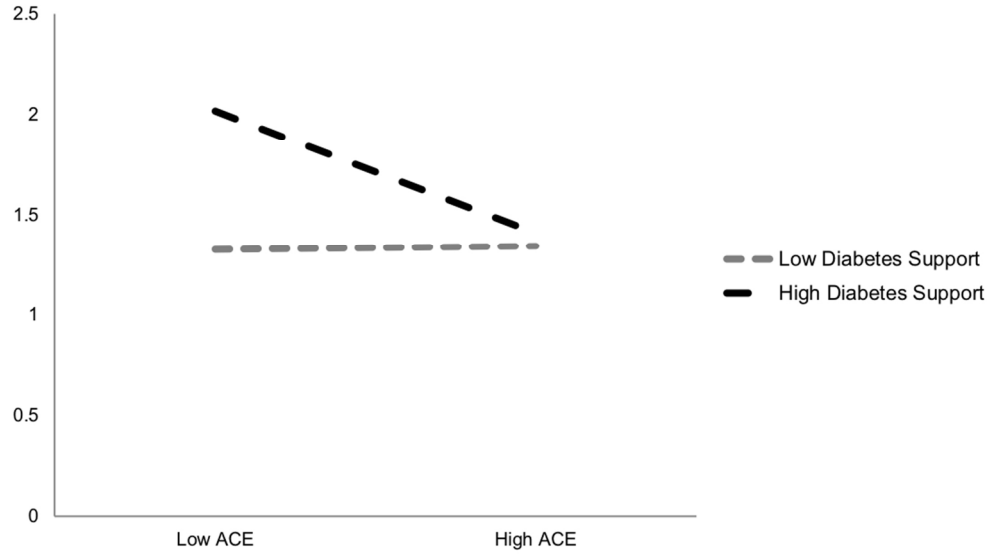

Figure 2

189x119mm (300 x 300 DPI)

Review only

Measures included in *Examining Protective and Buffering Associations Between Socio-Cultural Factors and Adverse Childhood Experiences among American Indian Adults with Type 2 Diabetes: A Quantitative, Community-Based Participatory Research Approach*

| Source                                                                                                         | Construct                                               | Question(s)                                                                                                                                                                                 | Response Options                                                                                                                                                                                                                                                                                                                                                |
|----------------------------------------------------------------------------------------------------------------|---------------------------------------------------------|---------------------------------------------------------------------------------------------------------------------------------------------------------------------------------------------|-----------------------------------------------------------------------------------------------------------------------------------------------------------------------------------------------------------------------------------------------------------------------------------------------------------------------------------------------------------------|
| n/a                                                                                                            | Date of Birth                                           | What is your date of birth?                                                                                                                                                                 | Verbatim Response                                                                                                                                                                                                                                                                                                                                               |
| n/a                                                                                                            | Gender                                                  | Many of the questions that we will ask throughout this interview depend on your gender. To make sure we skip you into the right questions, please tell me if your gender is male or female. | <ul style="list-style-type: none"> <li>• Male</li> <li>• Female</li> </ul>                                                                                                                                                                                                                                                                                      |
| n/a                                                                                                            | Income                                                  | Which of the categories best describes your total annual combined household income from all sources?                                                                                        | <ul style="list-style-type: none"> <li>• Less than \$5,000</li> <li>• \$5,001 to \$9,999</li> <li>• \$10,000 to \$14,999</li> <li>• \$15,000 to \$19,999</li> <li>• \$20,000 to \$29,999</li> <li>• \$30,000 to \$39,999</li> <li>• \$40,000 to \$49,999</li> <li>• \$50,000 to \$59,999</li> <li>• \$60,000 to \$69,999</li> <li>• \$70,000 or more</li> </ul> |
| The World Health Organization World Mental Health Composite International Diagnostic Interview (WHO WMH-CIDI). | Self-Rated Mental Health and Self-Rated Physical Health | <ol style="list-style-type: none"> <li>1. How would you rate your overall physical health?</li> <li>2. How would you rate your overall mental health?</li> </ol>                            | <ul style="list-style-type: none"> <li>• Excellent</li> <li>• Very Good</li> <li>• Good</li> <li>• Fair</li> <li>• Poor</li> </ul>                                                                                                                                                                                                                              |



|                                                                                                                                                              |                                              |                                                                                                                                                                                                                                                                                                                                                                                                                                                                                                                                                                                                                                                                                                                                                                                                                                                                                                                                                                                                                                                                                                                                                                                                                                                                                                                                                   |                                                                       |
|--------------------------------------------------------------------------------------------------------------------------------------------------------------|----------------------------------------------|---------------------------------------------------------------------------------------------------------------------------------------------------------------------------------------------------------------------------------------------------------------------------------------------------------------------------------------------------------------------------------------------------------------------------------------------------------------------------------------------------------------------------------------------------------------------------------------------------------------------------------------------------------------------------------------------------------------------------------------------------------------------------------------------------------------------------------------------------------------------------------------------------------------------------------------------------------------------------------------------------------------------------------------------------------------------------------------------------------------------------------------------------------------------------------------------------------------------------------------------------------------------------------------------------------------------------------------------------|-----------------------------------------------------------------------|
| <p>Adapted from:<br/>Centers for Disease<br/>Control and<br/>Prevention. <i>Behavioral Risk Factor Surveillance System Survey ACE Module Data, 2010.</i></p> | <p>Adverse<br/>Childhood<br/>Experiences</p> | <ol style="list-style-type: none"> <li>1. When you were growing up, did you live with a household member who was a problem drinker or alcoholic, or misused street or prescription drugs?</li> <li>2. When you were growing up, did you live with a household member who was depressed, mentally ill, or suicidal?</li> <li>3. When you were growing up, did you live with a household member who was ever sent to jail or prison?</li> <li>4. When you were growing up, how often did you see or hear a parent or household member in your home being slapped, kicked, punched, or beaten up?</li> <li>5. When you were growing up, how often did a parent, guardian, or other household member yell, scream, swear at you, insult you, or humiliate you?</li> <li>6. When you were growing up, how often did a parent, guardian, or other household member spank you, slap you, kick you, punch you, or beat you up?</li> <li>7. When you were growing up, how often did someone touch or fondle you in a sexual way when you did not want them to?</li> <li>8. When you were growing up, how often did someone make you touch their body in a sexual way when you did not want them to?</li> <li>9. When you were growing up, how often did someone actually have oral, anal, or vaginal intercourse when you did not want them to?</li> </ol> | <ul style="list-style-type: none"> <li>• Yes</li> <li>• No</li> </ul> |
|--------------------------------------------------------------------------------------------------------------------------------------------------------------|----------------------------------------------|---------------------------------------------------------------------------------------------------------------------------------------------------------------------------------------------------------------------------------------------------------------------------------------------------------------------------------------------------------------------------------------------------------------------------------------------------------------------------------------------------------------------------------------------------------------------------------------------------------------------------------------------------------------------------------------------------------------------------------------------------------------------------------------------------------------------------------------------------------------------------------------------------------------------------------------------------------------------------------------------------------------------------------------------------------------------------------------------------------------------------------------------------------------------------------------------------------------------------------------------------------------------------------------------------------------------------------------------------|-----------------------------------------------------------------------|

|                                                                                                                                                                                                                                                          |                                         |                                                                                                                                                                                                                                                                                                                                                                                                                                                                                                                                                                                                                                                                                                                                                                                                  |                                                                                                                                            |
|----------------------------------------------------------------------------------------------------------------------------------------------------------------------------------------------------------------------------------------------------------|-----------------------------------------|--------------------------------------------------------------------------------------------------------------------------------------------------------------------------------------------------------------------------------------------------------------------------------------------------------------------------------------------------------------------------------------------------------------------------------------------------------------------------------------------------------------------------------------------------------------------------------------------------------------------------------------------------------------------------------------------------------------------------------------------------------------------------------------------------|--------------------------------------------------------------------------------------------------------------------------------------------|
| <p>Adapted from: Shakespeare-Finch, J., &amp; Obst, P. L. (2011). The development of the 2-way social support scale: A measure of giving and receiving emotional and instrumental support. <i>Journal of personality assessment, 93</i>(5), 483-490.</p> | <p>2-Way Social Support Scale</p>       | <p><i>Now I am going to read a list of statements about social support. Please tell us the degree to which each statement is true for you.</i></p> <ol style="list-style-type: none"> <li>1. There is at least one person that I can share most things with.</li> <li>2. There is someone in my life I can get emotional support from.</li> <li>3. When I am feeling down, there is someone I can lean on.</li> <li>4. If I am stranded somewhere there is someone who would get me.</li> <li>5. I have someone to help me if I am physically unwell.</li> <li>6. There is someone who would give me financial assistance.</li> <li>7. There is someone who can help me fulfill my responsibilities when I am unable.</li> <li>8. I feel that I have a circle of people who value me.</li> </ol> | <ul style="list-style-type: none"> <li>• Not at all true</li> <li>• Sometimes true</li> <li>• Often true</li> <li>• Always true</li> </ul> |
| <p>Adapted from: Fitzgerald, J. T., Davis, W. K., Connell, C. M., Hess, G. E., Funnell, M. M., &amp; Hiss, R. G. (1996). Development and validation of the Diabetes Care Profile. <i>Evaluation &amp; the health professions, 19</i>(2), 208-230.</p>    | <p>Diabetes-specific support</p>        | <p><i>Now, think about support you receive as it relates specifically to your diabetes and tell me how much you agree or disagree with the following statements. My family or friends help and support me a lot to...</i></p> <ol style="list-style-type: none"> <li>1. Follow a healthy meal plan.</li> <li>2. Take my medicine.</li> <li>3. Get enough physical activity.</li> <li>4. Test my blood sugar.</li> <li>5. Handle my feelings about diabetes.</li> </ol>                                                                                                                                                                                                                                                                                                                           | <ul style="list-style-type: none"> <li>• Strongly Agree</li> <li>• Agree</li> <li>• Disagree</li> <li>• Strongly Disagree</li> </ul>       |
| <p>Adapted from: Whitbeck, L. B., Hoyt, D. R., Stubben, J. D., &amp; LaFromboise, T. (2001). Traditional culture and academic success among American Indian children in the upper Midwest. <i>Journal of American Indian Education, 48</i>-60.</p>       | <p>Traditional spiritual activities</p> | <p><i>In the past 12 months, have you...</i></p> <ol style="list-style-type: none"> <li>1. Offered tobacco?</li> <li>2. Participated in a sweat?</li> <li>3. Gone to ceremonial feasts?</li> <li>4. Gone to a traditional healer?</li> <li>5. Sought advice from a spiritual advisor?</li> <li>6. Used traditional medicine?</li> <li>7. Smudged or saged?</li> <li>8. Been taught ceremonial songs?</li> <li>9. Gone to Midewiwin Ceremonies?</li> </ol>                                                                                                                                                                                                                                                                                                                                        | <ul style="list-style-type: none"> <li>• Yes</li> <li>• No</li> </ul>                                                                      |

|                                                                                                                                                                                                                                                                                                                                               |                                                |                                                                                                                                                                                                                                                                                                                                                                                                                                                                                    |                                                                                                     |
|-----------------------------------------------------------------------------------------------------------------------------------------------------------------------------------------------------------------------------------------------------------------------------------------------------------------------------------------------|------------------------------------------------|------------------------------------------------------------------------------------------------------------------------------------------------------------------------------------------------------------------------------------------------------------------------------------------------------------------------------------------------------------------------------------------------------------------------------------------------------------------------------------|-----------------------------------------------------------------------------------------------------|
| <p>Adapted from:<br/>Mohatt, N. V., Fok,<br/>C. C. T., Burket, R.,<br/>Henry, D., &amp; Allen,<br/>J. (2011).<br/>Assessment of<br/>awareness of<br/>connectedness as a<br/>culturally-based<br/>protective factor for<br/>Alaska native<br/>youth. <i>Cultural<br/>Diversity and Ethnic<br/>Minority<br/>Psychology</i>, 17(4),<br/>444.</p> | <p>Awareness<br/>of<br/>connectedne<br/>ss</p> | <p><i>I am going to read you a list of<br/>statement about community, nature,<br/>and family.</i></p> <ol style="list-style-type: none"> <li>1. I feel connected to nature.</li> <li>2. I treat nature with respect.</li> <li>3. When I am hurting, my<br/>family hurts with me.</li> <li>4. My family's happiness is<br/>part of my happiness.</li> <li>5. My community believes I<br/>am important.</li> <li>6. My community's happiness<br/>is part of my happiness.</li> </ol> | <ul style="list-style-type: none"> <li>• Not at all</li> <li>• Somewhat</li> <li>• A lot</li> </ul> |
|-----------------------------------------------------------------------------------------------------------------------------------------------------------------------------------------------------------------------------------------------------------------------------------------------------------------------------------------------|------------------------------------------------|------------------------------------------------------------------------------------------------------------------------------------------------------------------------------------------------------------------------------------------------------------------------------------------------------------------------------------------------------------------------------------------------------------------------------------------------------------------------------------|-----------------------------------------------------------------------------------------------------|

## STROBE Statement—checklist of items that should be included in reports of observational studies

|                              | Item No | Recommendation                                                                                                                                                                                                                                                                                                                                                                                                                                                                                                                                                                                                                                                                                            |
|------------------------------|---------|-----------------------------------------------------------------------------------------------------------------------------------------------------------------------------------------------------------------------------------------------------------------------------------------------------------------------------------------------------------------------------------------------------------------------------------------------------------------------------------------------------------------------------------------------------------------------------------------------------------------------------------------------------------------------------------------------------------|
| <b>Title and abstract</b>    | 1       | (a) Indicate the study's design with a commonly used term in the title or the abstract. X Page 1<br>(b) Provide in the abstract an informative and balanced summary of what was done and what was found X Page 2                                                                                                                                                                                                                                                                                                                                                                                                                                                                                          |
| <b>Introduction</b>          |         |                                                                                                                                                                                                                                                                                                                                                                                                                                                                                                                                                                                                                                                                                                           |
| Background/rationale         | 2       | Explain the scientific background and rationale for the investigation being reported X Pages 4-6                                                                                                                                                                                                                                                                                                                                                                                                                                                                                                                                                                                                          |
| Objectives                   | 3       | State specific objectives, including any prespecified hypotheses Page 6                                                                                                                                                                                                                                                                                                                                                                                                                                                                                                                                                                                                                                   |
| <b>Methods</b>               |         |                                                                                                                                                                                                                                                                                                                                                                                                                                                                                                                                                                                                                                                                                                           |
| Study design                 | 4       | Present key elements of study design early in the paper X Page 2 & 6-8                                                                                                                                                                                                                                                                                                                                                                                                                                                                                                                                                                                                                                    |
| Setting                      | 5       | Describe the setting, locations, and relevant dates, including periods of recruitment, exposure, follow-up, and data collection X Pages 6 -8                                                                                                                                                                                                                                                                                                                                                                                                                                                                                                                                                              |
| Participants                 | 6       | (a) <i>Cohort study</i> —Give the eligibility criteria, and the sources and methods of selection of participants. Describe methods of follow-up<br><i>Case-control study</i> —Give the eligibility criteria, and the sources and methods of case ascertainment and control selection. Give the rationale for the choice of cases and controls<br><i>Cross-sectional study</i> —Give the eligibility criteria, and the sources and methods of selection of participants X Page 7<br>(b) <i>Cohort study</i> —For matched studies, give matching criteria and number of exposed and unexposed<br><i>Case-control study</i> —For matched studies, give matching criteria and the number of controls per case |
| Variables                    | 7       | Clearly define all outcomes, exposures, predictors, potential confounders, and effect modifiers. Give diagnostic criteria, if applicable X Pages 7 -8                                                                                                                                                                                                                                                                                                                                                                                                                                                                                                                                                     |
| Data sources/<br>measurement | 8*      | For each variable of interest, give sources of data and details of methods of assessment (measurement). Describe comparability of assessment methods if there is more than one group X Pages 7 -8                                                                                                                                                                                                                                                                                                                                                                                                                                                                                                         |
| Bias                         | 9       | Describe any efforts to address potential sources of bias see Page 12                                                                                                                                                                                                                                                                                                                                                                                                                                                                                                                                                                                                                                     |
| Study size                   | 10      | Explain how the study size was arrived at X Page 7                                                                                                                                                                                                                                                                                                                                                                                                                                                                                                                                                                                                                                                        |
| Quantitative variables       | 11      | Explain how quantitative variables were handled in the analyses. If applicable, describe which groupings were chosen and why X Page 8                                                                                                                                                                                                                                                                                                                                                                                                                                                                                                                                                                     |
| Statistical methods          | 12      | (a) Describe all statistical methods, including those used to control for confounding X Page 8<br>(b) Describe any methods used to examine subgroups and interactions X Pgs 8-10<br>(c) Explain how missing data were addressed X Page 7<br>(d) <i>Cohort study</i> —If applicable, explain how loss to follow-up was addressed<br><i>Case-control study</i> —If applicable, explain how matching of cases and controls was addressed<br><i>Cross-sectional study</i> —If applicable, describe analytical methods taking account of sampling strategy X Page 6-8<br>(e) Describe any sensitivity analyses N/A                                                                                             |

Continued on next page

**Results**

|                  |     |                                                                                                                                                                                                                                                                                                                                                                                                                                 |
|------------------|-----|---------------------------------------------------------------------------------------------------------------------------------------------------------------------------------------------------------------------------------------------------------------------------------------------------------------------------------------------------------------------------------------------------------------------------------|
| Participants     | 13* | (a) Report numbers of individuals at each stage of study—eg numbers potentially eligible, examined for eligibility, confirmed eligible, included in the study, completing follow-up, and analysed X Page 7<br>(b) Give reasons for non-participation at each stage N/A<br>(c) Consider use of a flow diagram N/A                                                                                                                |
| Descriptive data | 14* | (a) Give characteristics of study participants (eg demographic, clinical, social) and information on exposures and potential confounders X Page 8<br>(b) Indicate number of participants with missing data for each variable of interest X Page 8-9<br>(c) <i>Cohort study</i> —Summarise follow-up time (eg, average and total amount)                                                                                         |
| Outcome data     | 15* | <i>Cohort study</i> —Report numbers of outcome events or summary measures over time<br><i>Case-control study</i> —Report numbers in each exposure category, or summary measures of exposure<br><i>Cross-sectional study</i> —Report numbers of outcome events or summary measures X Page 9                                                                                                                                      |
| Main results     | 16  | (a) Give unadjusted estimates and, if applicable, confounder-adjusted estimates and their precision (eg, 95% confidence interval). Make clear which confounders were adjusted for and why they were included X page 10<br>(b) Report category boundaries when continuous variables were categorized N/A<br>(c) If relevant, consider translating estimates of relative risk into absolute risk for a meaningful time period N/A |
| Other analyses   | 17  | Report other analyses done—eg analyses of subgroups and interactions, and sensitivity analyses X Page 10                                                                                                                                                                                                                                                                                                                        |

**Discussion**

|                  |    |                                                                                                                                                                                         |
|------------------|----|-----------------------------------------------------------------------------------------------------------------------------------------------------------------------------------------|
| Key results      | 18 | Summarise key results with reference to study objectives X Pages 9-12                                                                                                                   |
| Limitations      | 19 | Discuss limitations of the study, taking into account sources of potential bias or imprecision. Discuss both direction and magnitude of any potential bias X Page 12                    |
| Interpretation   | 20 | Give a cautious overall interpretation of results considering objectives, limitations, multiplicity of analyses, results from similar studies, and other relevant evidence X Page 12-13 |
| Generalisability | 21 | Discuss the generalisability (external validity) of the study results X Page 12                                                                                                         |

**Other information**

|         |    |                                                                                                                                                                         |
|---------|----|-------------------------------------------------------------------------------------------------------------------------------------------------------------------------|
| Funding | 22 | Give the source of funding and the role of the funders for the present study and, if applicable, for the original study on which the present article is based X Page 17 |
|---------|----|-------------------------------------------------------------------------------------------------------------------------------------------------------------------------|
