# Supplementary material for: Examining protective and buffering associations between sociocultural factors and adverse childhood experiences among American Indian adults with type 2 diabetes: a quantitative, community-based participatory research approach
Source: PubMed Central journal article supplement — BMJ Open. 2018 Sep 19;8(9):e022265. doi: 10.1136/bmjopen-2018-022265 (PMC6150153; doi:10.1136/bmjopen-2018-022265), 2018-09-19
Supplement: bmjopen-2018-022265supp001.pdf [file bmjopen-2018-022265supp001.pdf]

Measures included in *Examining Protective and Buffering Associations Between Socio-Cultural Factors and Adverse Childhood Experiences among American Indian Adults with Type 2 Diabetes: A Quantitative, Community-Based Participatory Research Approach*

| Source                                                                                                         | Construct                                               | Question(s)                                                                                                                                                                                 | Response Options                                                                                                                                                                                                                                                                                                                                                |
|----------------------------------------------------------------------------------------------------------------|---------------------------------------------------------|---------------------------------------------------------------------------------------------------------------------------------------------------------------------------------------------|-----------------------------------------------------------------------------------------------------------------------------------------------------------------------------------------------------------------------------------------------------------------------------------------------------------------------------------------------------------------|
| n/a                                                                                                            | Date of Birth                                           | What is your date of birth?                                                                                                                                                                 | Verbatim Response                                                                                                                                                                                                                                                                                                                                               |
| n/a                                                                                                            | Gender                                                  | Many of the questions that we will ask throughout this interview depend on your gender. To make sure we skip you into the right questions, please tell me if your gender is male or female. | <ul style="list-style-type: none"> <li>• Male</li> <li>• Female</li> </ul>                                                                                                                                                                                                                                                                                      |
| n/a                                                                                                            | Income                                                  | Which of the categories best describes your total annual combined household income from all sources?                                                                                        | <ul style="list-style-type: none"> <li>• Less than \$5,000</li> <li>• \$5,001 to \$9,999</li> <li>• \$10,000 to \$14,999</li> <li>• \$15,000 to \$19,999</li> <li>• \$20,000 to \$29,999</li> <li>• \$30,000 to \$39,999</li> <li>• \$40,000 to \$49,999</li> <li>• \$50,000 to \$59,999</li> <li>• \$60,000 to \$69,999</li> <li>• \$70,000 or more</li> </ul> |
| The World Health Organization World Mental Health Composite International Diagnostic Interview (WHO WMH-CIDI). | Self-Rated Mental Health and Self-Rated Physical Health | <ol style="list-style-type: none"> <li>1. How would you rate your overall physical health?</li> <li>2. How would you rate your overall mental health?</li> </ol>                            | <ul style="list-style-type: none"> <li>• Excellent</li> <li>• Very Good</li> <li>• Good</li> <li>• Fair</li> <li>• Poor</li> </ul>                                                                                                                                                                                                                              |

|                                                                                                                                                              |                                              |                                                                                                                                                                                                                                                                                                                                                                                                                                                                                                                                                                                                                                                                                                                                                                                                                                                                                                                                                                                                                                                                                                                                                                                                                                                                                                                                                   |                                                                       |
|--------------------------------------------------------------------------------------------------------------------------------------------------------------|----------------------------------------------|---------------------------------------------------------------------------------------------------------------------------------------------------------------------------------------------------------------------------------------------------------------------------------------------------------------------------------------------------------------------------------------------------------------------------------------------------------------------------------------------------------------------------------------------------------------------------------------------------------------------------------------------------------------------------------------------------------------------------------------------------------------------------------------------------------------------------------------------------------------------------------------------------------------------------------------------------------------------------------------------------------------------------------------------------------------------------------------------------------------------------------------------------------------------------------------------------------------------------------------------------------------------------------------------------------------------------------------------------|-----------------------------------------------------------------------|
| <p>Adapted from:<br/>Centers for Disease<br/>Control and<br/>Prevention. <i>Behavioral Risk Factor Surveillance System Survey ACE Module Data, 2010.</i></p> | <p>Adverse<br/>Childhood<br/>Experiences</p> | <ol style="list-style-type: none"> <li>1. When you were growing up, did you live with a household member who was a problem drinker or alcoholic, or misused street or prescription drugs?</li> <li>2. When you were growing up, did you live with a household member who was depressed, mentally ill, or suicidal?</li> <li>3. When you were growing up, did you live with a household member who was ever sent to jail or prison?</li> <li>4. When you were growing up, how often did you see or hear a parent or household member in your home being slapped, kicked, punched, or beaten up?</li> <li>5. When you were growing up, how often did a parent, guardian, or other household member yell, scream, swear at you, insult you, or humiliate you?</li> <li>6. When you were growing up, how often did a parent, guardian, or other household member spank you, slap you, kick you, punch you, or beat you up?</li> <li>7. When you were growing up, how often did someone touch or fondle you in a sexual way when you did not want them to?</li> <li>8. When you were growing up, how often did someone make you touch their body in a sexual way when you did not want them to?</li> <li>9. When you were growing up, how often did someone actually have oral, anal, or vaginal intercourse when you did not want them to?</li> </ol> | <ul style="list-style-type: none"> <li>• Yes</li> <li>• No</li> </ul> |
|--------------------------------------------------------------------------------------------------------------------------------------------------------------|----------------------------------------------|---------------------------------------------------------------------------------------------------------------------------------------------------------------------------------------------------------------------------------------------------------------------------------------------------------------------------------------------------------------------------------------------------------------------------------------------------------------------------------------------------------------------------------------------------------------------------------------------------------------------------------------------------------------------------------------------------------------------------------------------------------------------------------------------------------------------------------------------------------------------------------------------------------------------------------------------------------------------------------------------------------------------------------------------------------------------------------------------------------------------------------------------------------------------------------------------------------------------------------------------------------------------------------------------------------------------------------------------------|-----------------------------------------------------------------------|

|                                                                                                                                                                                                                                                          |                                         |                                                                                                                                                                                                                                                                                                                                                                                                                                                                                                                                                                                                                                                                                                                                                                                                  |                                                                                                                                            |
|----------------------------------------------------------------------------------------------------------------------------------------------------------------------------------------------------------------------------------------------------------|-----------------------------------------|--------------------------------------------------------------------------------------------------------------------------------------------------------------------------------------------------------------------------------------------------------------------------------------------------------------------------------------------------------------------------------------------------------------------------------------------------------------------------------------------------------------------------------------------------------------------------------------------------------------------------------------------------------------------------------------------------------------------------------------------------------------------------------------------------|--------------------------------------------------------------------------------------------------------------------------------------------|
| <p>Adapted from: Shakespeare-Finch, J., &amp; Obst, P. L. (2011). The development of the 2-way social support scale: A measure of giving and receiving emotional and instrumental support. <i>Journal of personality assessment, 93</i>(5), 483-490.</p> | <p>2-Way Social Support Scale</p>       | <p><i>Now I am going to read a list of statements about social support. Please tell us the degree to which each statement is true for you.</i></p> <ol style="list-style-type: none"> <li>1. There is at least one person that I can share most things with.</li> <li>2. There is someone in my life I can get emotional support from.</li> <li>3. When I am feeling down, there is someone I can lean on.</li> <li>4. If I am stranded somewhere there is someone who would get me.</li> <li>5. I have someone to help me if I am physically unwell.</li> <li>6. There is someone who would give me financial assistance.</li> <li>7. There is someone who can help me fulfill my responsibilities when I am unable.</li> <li>8. I feel that I have a circle of people who value me.</li> </ol> | <ul style="list-style-type: none"> <li>• Not at all true</li> <li>• Sometimes true</li> <li>• Often true</li> <li>• Always true</li> </ul> |
| <p>Adapted from: Fitzgerald, J. T., Davis, W. K., Connell, C. M., Hess, G. E., Funnell, M. M., &amp; Hiss, R. G. (1996). Development and validation of the Diabetes Care Profile. <i>Evaluation &amp; the health professions, 19</i>(2), 208-230.</p>    | <p>Diabetes-specific support</p>        | <p><i>Now, think about support you receive as it relates specifically to your diabetes and tell me how much you agree or disagree with the following statements. My family or friends help and support me a lot to...</i></p> <ol style="list-style-type: none"> <li>1. Follow a healthy meal plan.</li> <li>2. Take my medicine.</li> <li>3. Get enough physical activity.</li> <li>4. Test my blood sugar.</li> <li>5. Handle my feelings about diabetes.</li> </ol>                                                                                                                                                                                                                                                                                                                           | <ul style="list-style-type: none"> <li>• Strongly Agree</li> <li>• Agree</li> <li>• Disagree</li> <li>• Strongly Disagree</li> </ul>       |
| <p>Adapted from: Whitbeck, L. B., Hoyt, D. R., Stubben, J. D., &amp; LaFromboise, T. (2001). Traditional culture and academic success among American Indian children in the upper Midwest. <i>Journal of American Indian Education, 48</i>-60.</p>       | <p>Traditional spiritual activities</p> | <p><i>In the past 12 months, have you...</i></p> <ol style="list-style-type: none"> <li>1. Offered tobacco?</li> <li>2. Participated in a sweat?</li> <li>3. Gone to ceremonial feasts?</li> <li>4. Gone to a traditional healer?</li> <li>5. Sought advice from a spiritual advisor?</li> <li>6. Used traditional medicine?</li> <li>7. Smudged or saged?</li> <li>8. Been taught ceremonial songs?</li> <li>9. Gone to Midewiwin Ceremonies?</li> </ol>                                                                                                                                                                                                                                                                                                                                        | <ul style="list-style-type: none"> <li>• Yes</li> <li>• No</li> </ul>                                                                      |

|                                                                                                                                                                                                                                                                                                                                               |                                                |                                                                                                                                                                                                                                                                                                                                                                                                                                                                                    |                                                                                                     |
|-----------------------------------------------------------------------------------------------------------------------------------------------------------------------------------------------------------------------------------------------------------------------------------------------------------------------------------------------|------------------------------------------------|------------------------------------------------------------------------------------------------------------------------------------------------------------------------------------------------------------------------------------------------------------------------------------------------------------------------------------------------------------------------------------------------------------------------------------------------------------------------------------|-----------------------------------------------------------------------------------------------------|
| <p>Adapted from:<br/>Mohatt, N. V., Fok,<br/>C. C. T., Burket, R.,<br/>Henry, D., &amp; Allen,<br/>J. (2011).<br/>Assessment of<br/>awareness of<br/>connectedness as a<br/>culturally-based<br/>protective factor for<br/>Alaska native<br/>youth. <i>Cultural<br/>Diversity and Ethnic<br/>Minority<br/>Psychology</i>, 17(4),<br/>444.</p> | <p>Awareness<br/>of<br/>connectedne<br/>ss</p> | <p><i>I am going to read you a list of<br/>statement about community, nature,<br/>and family.</i></p> <ol style="list-style-type: none"> <li>1. I feel connected to nature.</li> <li>2. I treat nature with respect.</li> <li>3. When I am hurting, my<br/>family hurts with me.</li> <li>4. My family's happiness is<br/>part of my happiness.</li> <li>5. My community believes I<br/>am important.</li> <li>6. My community's happiness<br/>is part of my happiness.</li> </ol> | <ul style="list-style-type: none"> <li>• Not at all</li> <li>• Somewhat</li> <li>• A lot</li> </ul> |
|-----------------------------------------------------------------------------------------------------------------------------------------------------------------------------------------------------------------------------------------------------------------------------------------------------------------------------------------------|------------------------------------------------|------------------------------------------------------------------------------------------------------------------------------------------------------------------------------------------------------------------------------------------------------------------------------------------------------------------------------------------------------------------------------------------------------------------------------------------------------------------------------------|-----------------------------------------------------------------------------------------------------|
